# Supplementary material for: T- and B-cell immunosuppressive activity of novel α-santonin analogs with humoral and cellular immune response in Balb/c mice
Source: Royal Society of Chemistry journal article supplement (doi:10.1039/c6md00527f), 2016-11-11
Supplement: c6md00527f1.pdf [file c6md00527f1.pdf]

**T- and B-cell immunosuppressive activity of novel  $\alpha$ -santonin analogs with humoral and cellular immune response in Balb/c mice**

Nisar A. Dangroo<sup>a</sup>, Jasvinder Singh<sup>b,c</sup>, Nidhi Gupta<sup>a</sup>, Shashank Singh<sup>b,c</sup>, Anapurna Kaul<sup>b,c</sup>,  
Mohammed A. Khuroo<sup>d</sup>, and Payare L. Sangwan<sup>a,c,\*</sup>

<sup>a</sup>*Bioorganic Chemistry Division, <sup>b</sup>Cancer Pharmacology Division, CSIR-Indian Institute of Integrative Medicine, Canal Road Jammu-180001, India*

<sup>c</sup>*Academy of Scientific and Innovative Research (AcSIR), CSIR-IIIM Campus, Jammu, India*

<sup>d</sup>*University of Kashmir, Hazratbal Road, Srinagar, India*

#IIIM publication no. IIIM/1970/2016

\*Corresponding authors. Tel.: +91 191 2585006-13 Extn. 371; fax +91 191 2586333.

*E-mails; [plsangwan@iiim.ac.in](mailto:plsangwan@iiim.ac.in) (P.L. Sangwan)*

## CONTENTS:

|                                                                                         |      |
|-----------------------------------------------------------------------------------------|------|
| Section A: General Methods                                                              | 2    |
| Section B: $^1\text{H}$ NMR, $^{13}\text{C}$ NMR, DEPT135 and HRMS spectra of compounds | 3-47 |

## Section A

### General Methods

All the reagents and solvents for executing the present work were obtained from Sigma Aldrich. Dry DCM was prepared first by distilling it and then refluxing it over  $\text{CaH}_2$  (5% w/v) for few hours and again distilled it and finally stored it over  $4\text{A}^\circ$  molecular sieves for future use. Pyridine was dried over KOH for one week, then distilled and stored over  $4\text{A}^\circ$  molecular sieves and used throughout the synthesis. All the chemical reactions were monitored by TLC on 0.25 mm silica gel 60 F254 plates (E. Merck) using 2% ceric ammonium sulphate solution as a spraying reagent for detection of the spots on the TLC. Purification of all the compounds was carried out by column chromatography using Silica gel 60-120 mesh stationary phase or by recrystallation.  $^1\text{H}$  NMR and  $^{13}\text{C}$  NMR spectra were recorded on Bruker DPX 400 and DPX 500 instruments using  $\text{CDCl}_3$  or  $\text{CD}_3\text{OD}$  as the solvents with TMS as internal standard. The chemical shifts were expressed in  $\delta$  ppm and coupling constants in Hertz. High resolution mass spectra (HREIMS) were recorded on Agilent Technologies 6540 instrument.

Section B:  $^1\text{H}$  NMR,  $^{13}\text{C}$  NMR, DEPT135 and HRMS spectra of compounds

2-  $^1\text{H}$  NMR

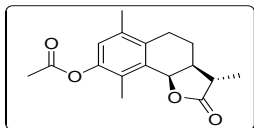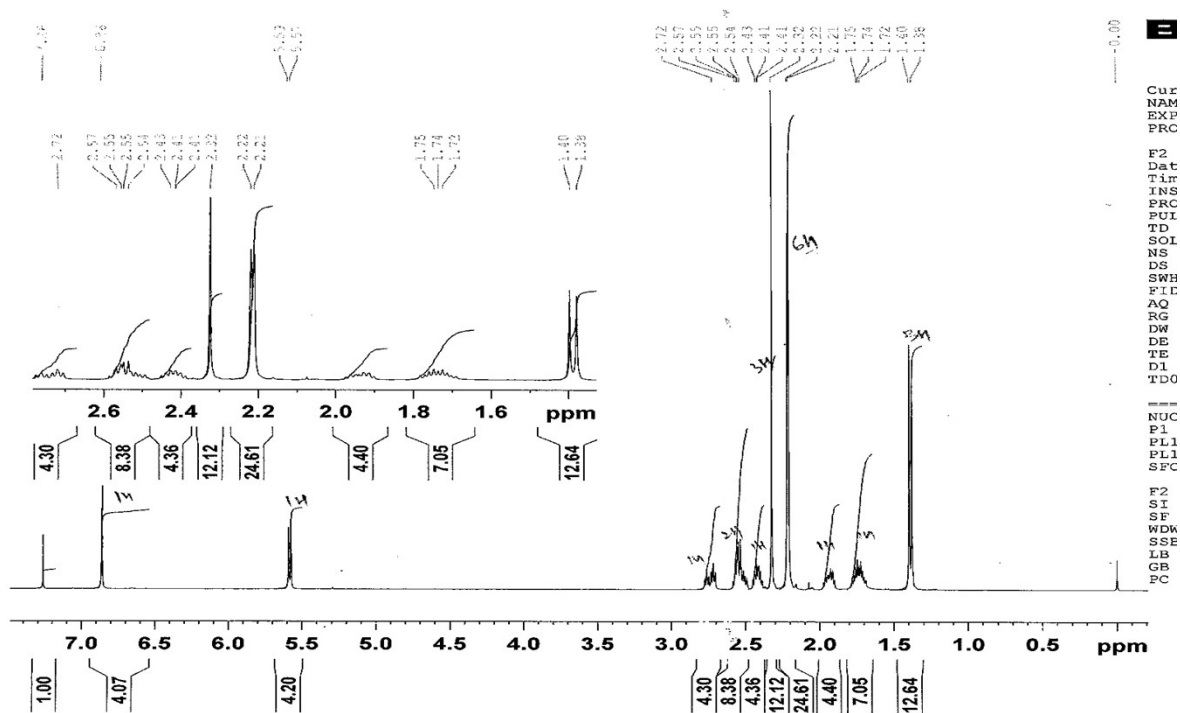

# 2- HRMS

|                               |                  |                      |                       |
|-------------------------------|------------------|----------------------|-----------------------|
| <b>Data File</b>              | SN-AC.d          | <b>Sample Name</b>   | SN-AC                 |
| <b>Sample Type</b>            | Sample           | <b>Position</b>      | Vial 15               |
| <b>Instrument Name</b>        | Instrument 1     | <b>User Name</b>     |                       |
| <b>Acq Method</b>             | visha_12-01-13.m | <b>Acquired Time</b> | 04-06-2015 PM 2:28:06 |
| <b>IRM Calibration Status</b> |                  | <b>DA Method</b>     | daily_report.m        |
| <b>Comment</b>                |                  |                      |                       |

  

|                       |                             |              |
|-----------------------|-----------------------------|--------------|
| <b>Sample Group</b>   | 6200 series TOF/6500 series | <b>Info.</b> |
| <b>Acquisition SW</b> | Q-TOF B.05.01 (85125)       |              |
| <b>Version</b>        |                             |              |

| Compound Label    | RT   | Mass     | Formula    | MFG Formula | MFG Diff (ppm) | DB Formula |
|-------------------|------|----------|------------|-------------|----------------|------------|
| Cpd 6: C17 H20 O4 | 0.26 | 288.1382 | C17 H20 O4 | C17 H20 O4  | -7.19          | C17 H20 O4 |

| Compound Label    | m/z      | RT   | Algorithm                 | Mass     |
|-------------------|----------|------|---------------------------|----------|
| Cpd 6: C17 H20 O4 | 289.1451 | 0.26 | Find by Molecular Feature | 288.1382 |

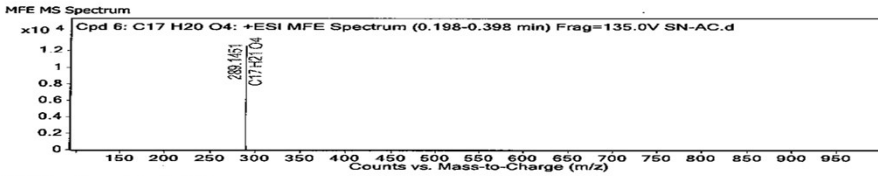

| m/z      | z | Abund    | Formula    | Ion    |
|----------|---|----------|------------|--------|
| 289.1451 | 1 | 12623.54 | C17 H21 O4 | (M+H)+ |
| 290.1499 | 1 | 2400.3   | C17 H21 O4 | (M+H)+ |
| 291.1572 | 1 | 428.05   | C17 H21 O4 | (M+H)+ |

| Isotope | m/z      | Calc m/z | Diff (ppm) | Abund % | Calc Abund % | Abund Sum % | Calc Abund Sum % |
|---------|----------|----------|------------|---------|--------------|-------------|------------------|
| 1       | 289.1451 | 289.1434 | -5.85      | 100     | 100          | 81.7        | 82.48            |
| 2       | 290.1499 | 290.1468 | -10.47     | 19.01   | 18.78        | 15.53       | 15.49            |
| 3       | 291.1572 | 291.1494 | -26.96     | 3.39    | 2.49         | 2.77        | 2.05             |

--- End Of Report ---

# 4a-<sup>1</sup>H NMR

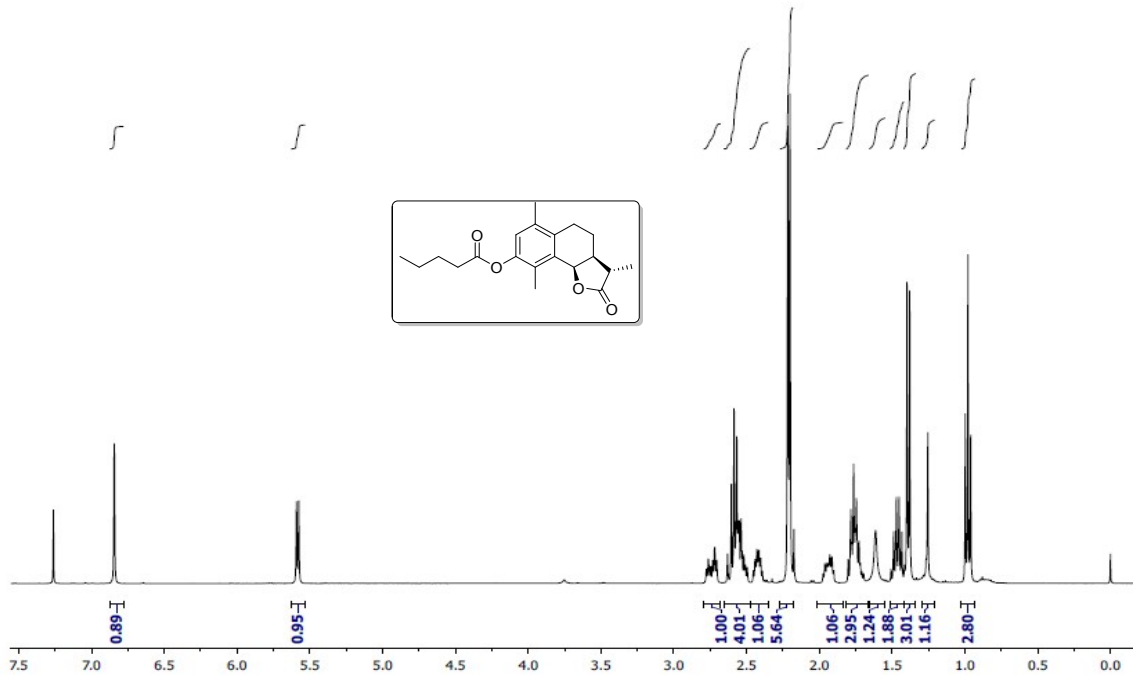

# 4a-<sup>13</sup>CNMR

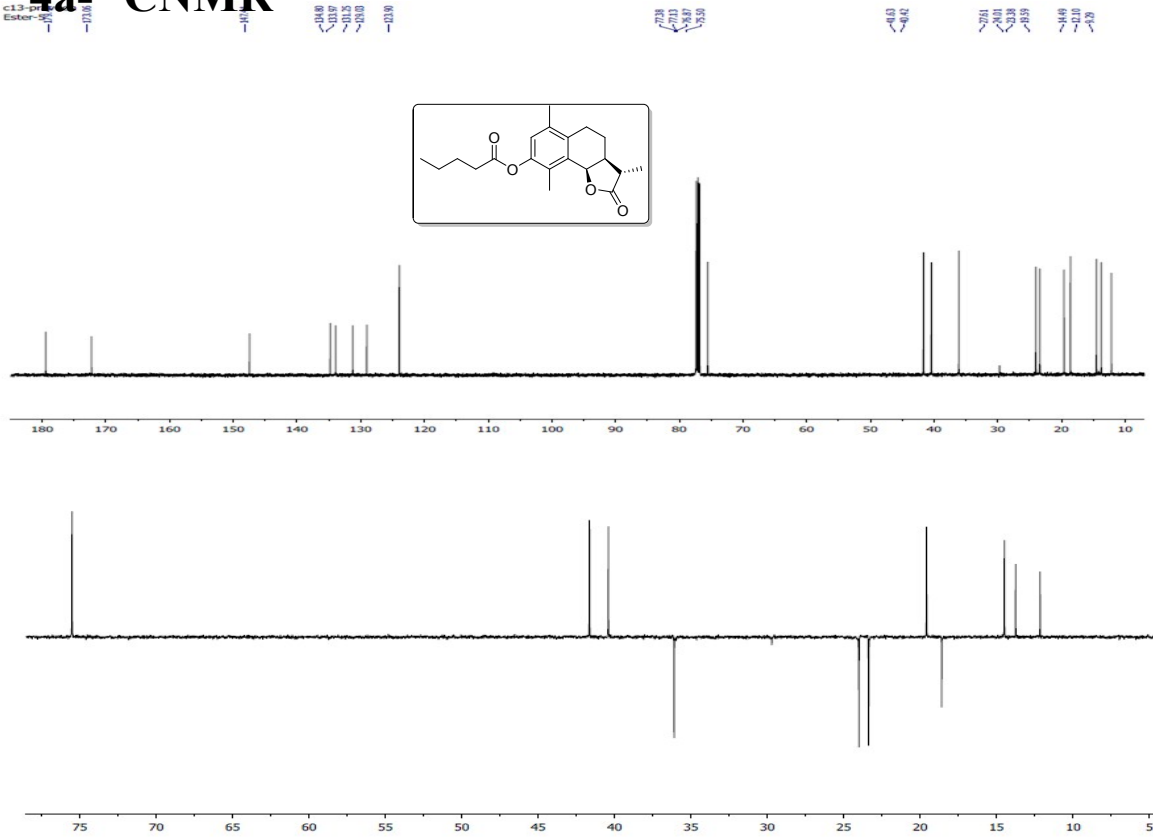

## 4a-HRMS

### Compound Table

| Compound Label                                         | RT    | Mass     | Formula                                        | MFG Formula                                    | MFG Diff (ppm) | DB Formula                                     |
|--------------------------------------------------------|-------|----------|------------------------------------------------|------------------------------------------------|----------------|------------------------------------------------|
| Cpd 30: C <sub>20</sub> H <sub>26</sub> O <sub>4</sub> | 0.343 | 330.1832 | C <sub>20</sub> H <sub>26</sub> O <sub>4</sub> | C <sub>20</sub> H <sub>26</sub> O <sub>4</sub> | -0.22          | C <sub>20</sub> H <sub>26</sub> O <sub>4</sub> |

| Compound Label                                         | m/z      | RT    | Algorithm                 | Mass     |
|--------------------------------------------------------|----------|-------|---------------------------|----------|
| Cpd 30: C <sub>20</sub> H <sub>26</sub> O <sub>4</sub> | 331.1904 | 0.343 | Find by Molecular Feature | 330.1832 |

### MFE MS Spectrum

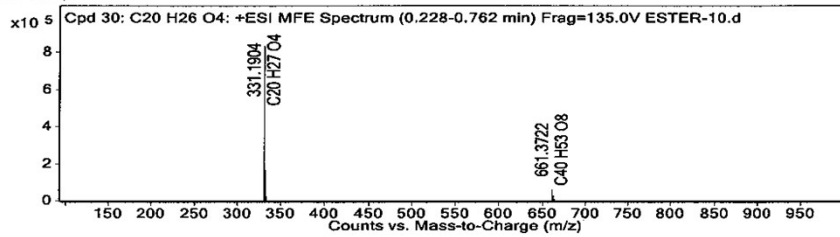

### MS Spectrum Peak List

| m/z      | z | Abund     | Formula                                        | Ion                 |
|----------|---|-----------|------------------------------------------------|---------------------|
| 331.1904 | 1 | 833862.25 | C <sub>20</sub> H <sub>27</sub> O <sub>4</sub> | (M+H) <sup>+</sup>  |
| 332.194  | 1 | 166759.95 | C <sub>20</sub> H <sub>27</sub> O <sub>4</sub> | (M+H) <sup>+</sup>  |
| 333.1971 | 1 | 23436.2   | C <sub>20</sub> H <sub>27</sub> O <sub>4</sub> | (M+H) <sup>+</sup>  |
| 661.3722 | 1 | 62812.54  | C <sub>40</sub> H <sub>53</sub> O <sub>8</sub> | (2M+H) <sup>+</sup> |
| 662.3752 | 1 | 27424.81  | C <sub>40</sub> H <sub>53</sub> O <sub>8</sub> | (2M+H) <sup>+</sup> |

### Predicted Isotope Match Table

| Isotope | m/z      | Calc m/z | Diff (ppm) | Abund % | Calc Abund % | Abund Sum % | Calc Abund Sum % |
|---------|----------|----------|------------|---------|--------------|-------------|------------------|
| 1       | 331.1904 | 331.1904 | -0.06      | 100     | 100          | 80.98       | 79.61            |
| 2       | 332.194  | 332.1938 | -0.63      | 20      | 22.09        | 16.2        | 17.59            |
| 3       | 333.1971 | 333.1965 | -1.7       | 2.81    | 3.15         | 2.28        | 2.5              |
| 4       | 334.2004 | 334.1992 | -3.53      | 0.56    | 0.34         | 0.46        | 0.27             |
| 5       | 335.2051 | 335.2019 | -9.51      | 0.11    | 0.03         | 0.09        | 0.02             |

--- End Of Report ---

# 4b- <sup>1</sup>H NMR

20-Jun-06c-1a  
ESTev-4

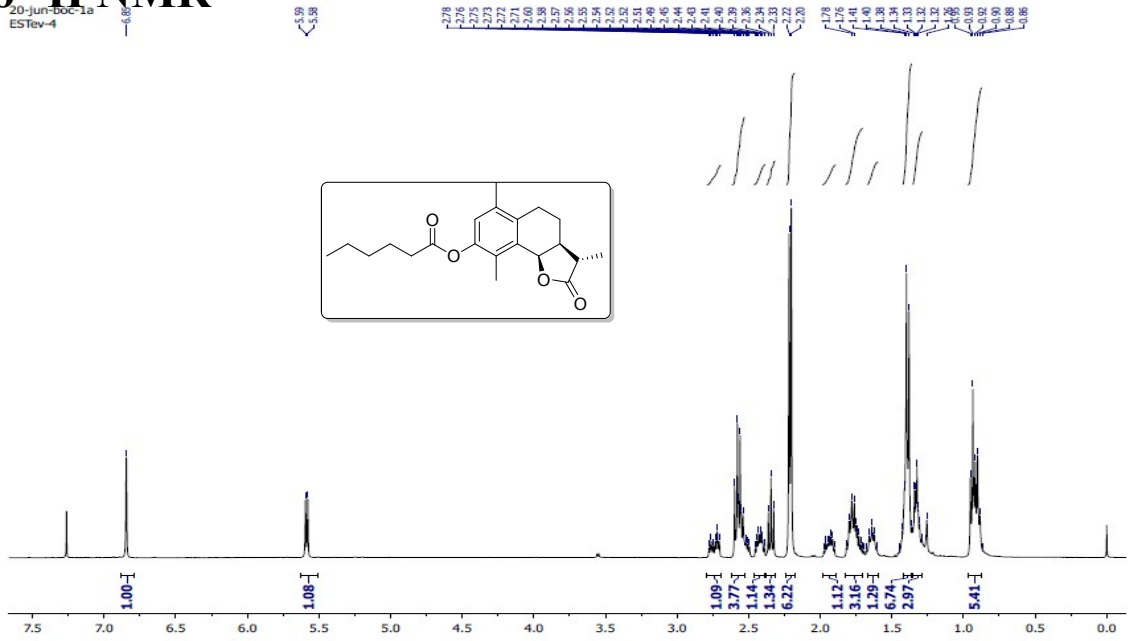

# 4b- <sup>13</sup>C NMR

27-may-c13 ester

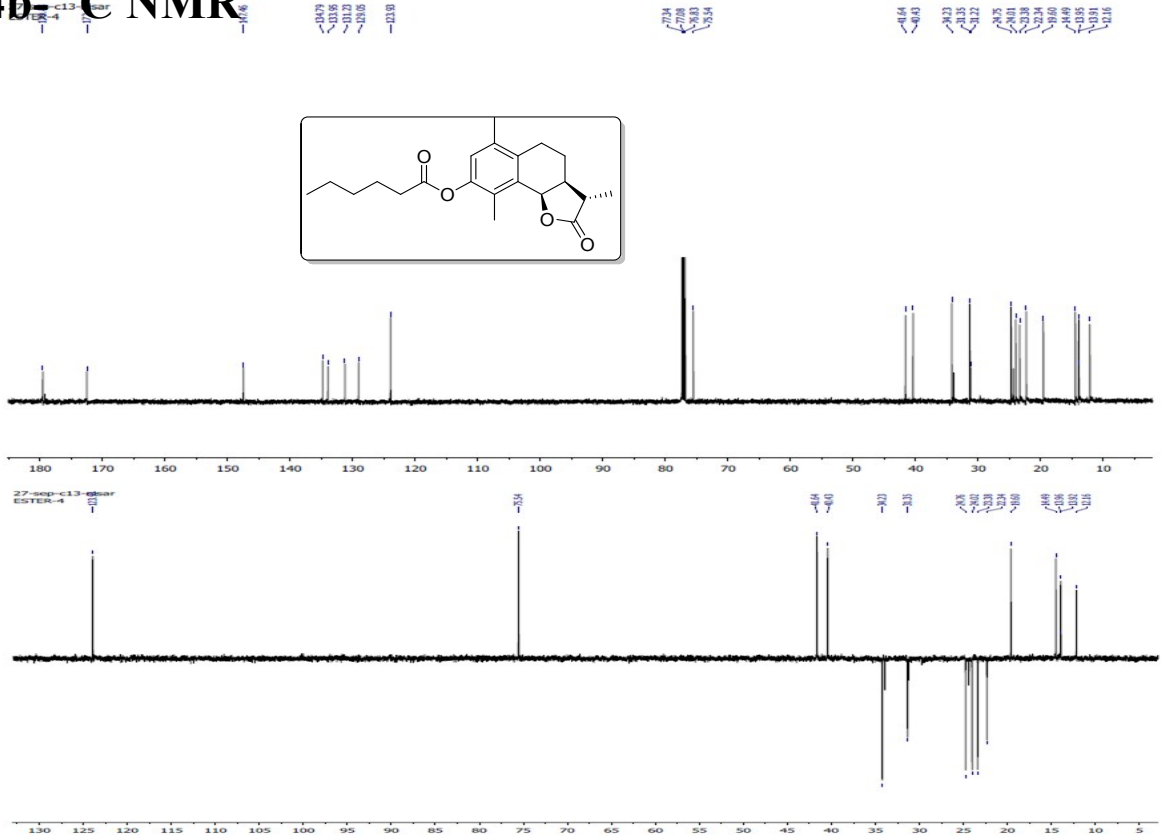

# 4b-HRMS

Compound Table

| Compound Label     | RT    | Mass     | Formula    | MFG Formula | MFG Diff (ppm) | DB Formula |
|--------------------|-------|----------|------------|-------------|----------------|------------|
| Cpd 41: C21 H28 O4 | 0.344 | 344.2005 | C21 H28 O4 | C21 H28 O4  | -4.99          | C21 H28 O4 |

| Compound Label     | m/z      | RT    | Algorithm                 | Mass     |
|--------------------|----------|-------|---------------------------|----------|
| Cpd 41: C21 H28 O4 | 345.2077 | 0.344 | Find by Molecular Feature | 344.2005 |

MFE MS Spectrum

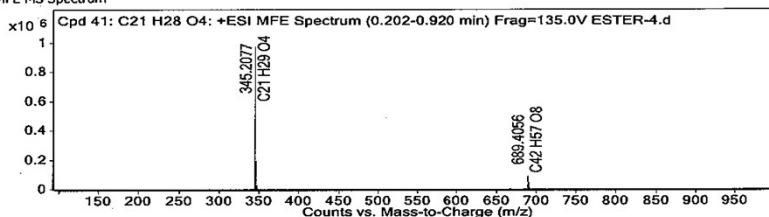

MS Spectrum Peak List

| m/z      | z | Abund     | Formula    | Ion     |
|----------|---|-----------|------------|---------|
| 345.2077 | 1 | 971585.25 | C21 H29 O4 | (M+H)+  |
| 346.2113 | 1 | 191310.58 | C21 H29 O4 | (M+H)+  |
| 347.2138 | 1 | 29088.8   | C21 H29 O4 | (M+H)+  |
| 689.4056 | 1 | 87788.53  | C42 H57 O8 | (2M+H)+ |
| 690.409  | 1 | 41244.23  | C42 H57 O8 | (2M+H)+ |

Predicted Isotope Match Table

| Isotope | m/z      | Calc m/z | Diff (ppm) | Abund % | Calc Abund % | Abund Sum % | Calc Abund Sum % |
|---------|----------|----------|------------|---------|--------------|-------------|------------------|
| 1       | 345.2077 | 345.206  | -4.89      | 100     | 100          | 81.12       | 78.74            |
| 2       | 346.2113 | 346.2094 | -5.32      | 19.69   | 23.2         | 15.97       | 18.27            |
| 3       | 347.2138 | 347.2122 | -4.53      | 2.99    | 3.39         | 2.43        | 2.67             |
| 4       | 348.2179 | 348.2149 | -8.42      | 0.5     | 0.37         | 0.41        | 0.29             |
| 5       | 349.2218 | 349.2176 | -11.92     | 0.09    | 0.03         | 0.07        | 0.03             |

--- End Of Report ---

# 4c-<sup>1</sup>H NMR

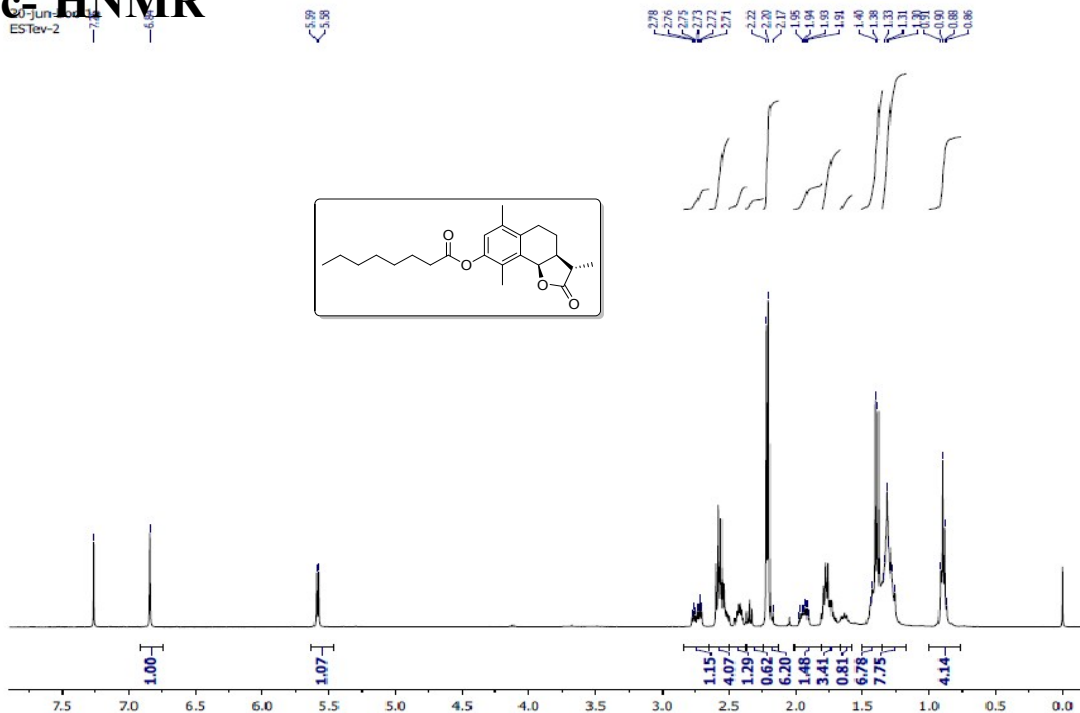





# 4d-<sup>1</sup>H NMR

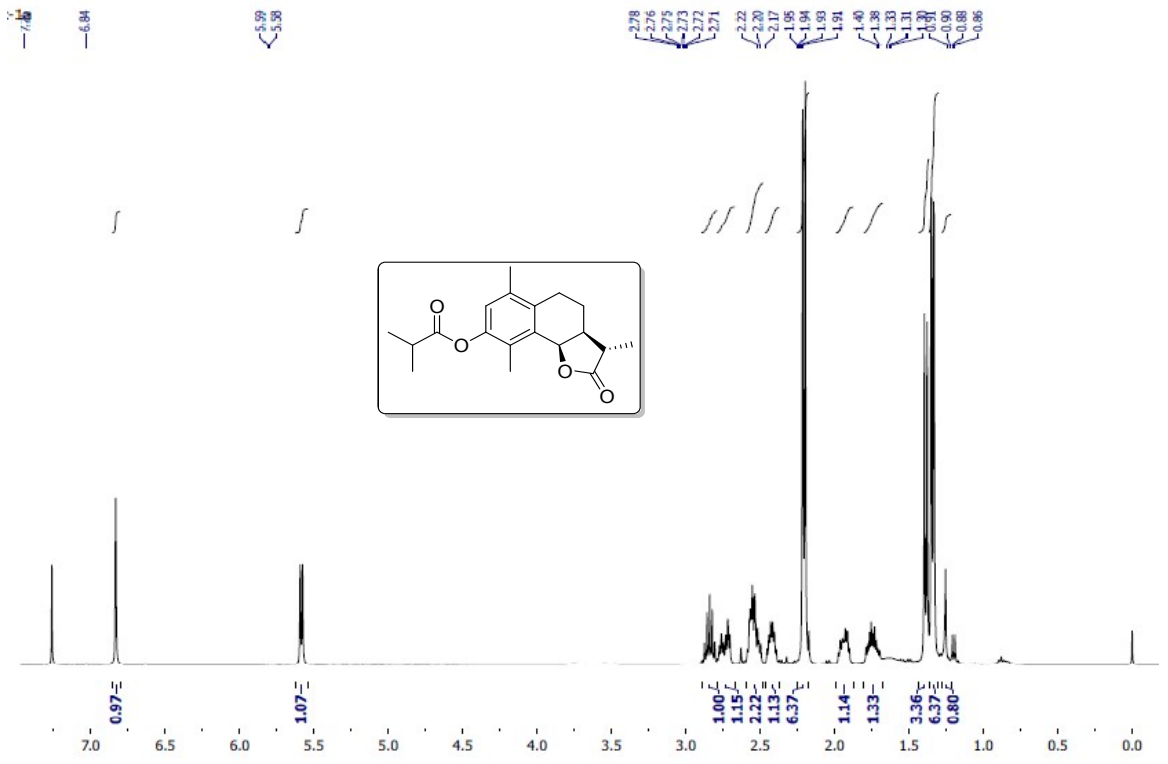

# 4d-<sup>13</sup>C NMR

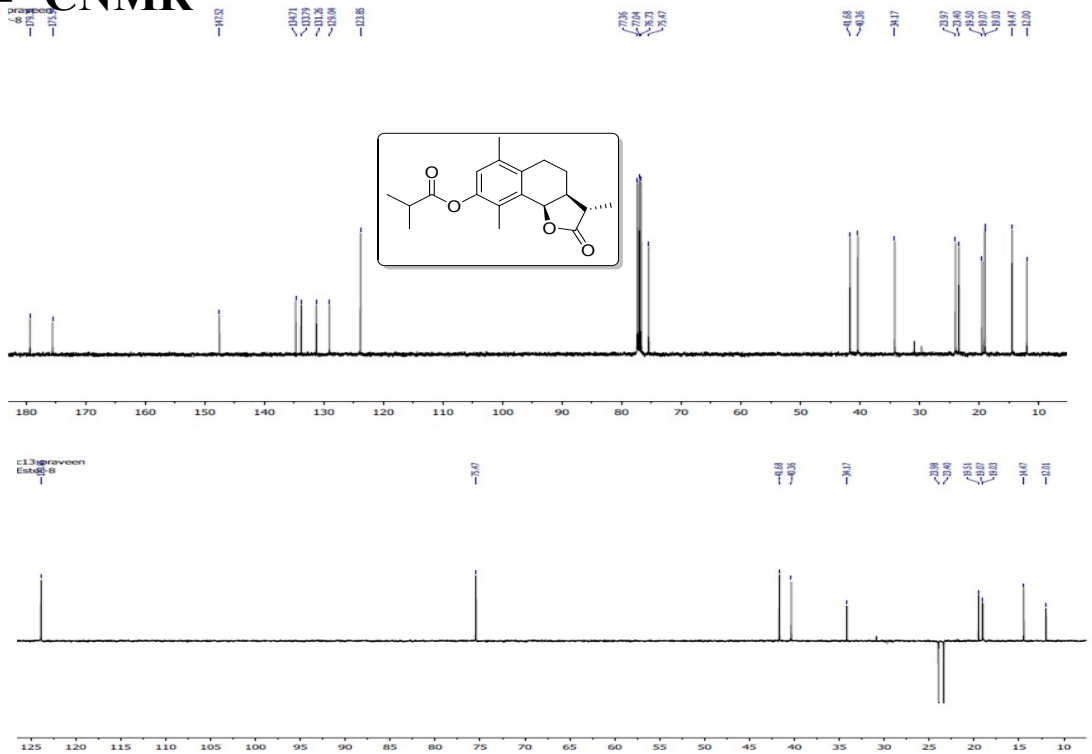

# 4d-HRMS

Compound Table

| Compound Label     | RT    | Mass     | Formula    | MFG Formula | MFG Diff (ppm) | DB Formula |
|--------------------|-------|----------|------------|-------------|----------------|------------|
| Cpd 33: C19 H24 O4 | 0.344 | 316.1686 | C19 H24 O4 | C19 H24 O4  | -3.7           | C19 H24 O4 |

| Compound Label     | m/z      | RT    | Algorithm                 | Mass     |
|--------------------|----------|-------|---------------------------|----------|
| Cpd 33: C19 H24 O4 | 317.1759 | 0.344 | Find by Molecular Feature | 316.1686 |

MFE MS Spectrum

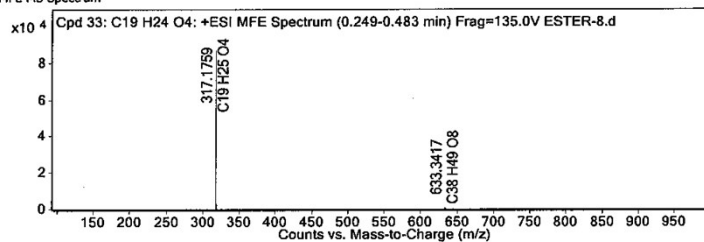

MS Spectrum Peak List

| m/z      | z | Abund   | Formula    | Ion     |
|----------|---|---------|------------|---------|
| 317.1759 | 1 | 86736.3 | C19 H25 O4 | (M+H)+  |
| 318.1794 | 1 | 16992.7 | C19 H25 O4 | (M+H)+  |
| 319.1825 | 1 | 2939.97 | C19 H25 O4 | (M+H)+  |
| 633.3417 | 1 | 729.04  | C38 H49 O8 | (2M+H)+ |
| 634.344  | 1 | 351.9   | C38 H49 O8 | (2M+H)+ |

Predicted Isotope Match Table

| Isotope | m/z      | Calc m/z | Diff (ppm) | Abund % | Calc Abund % | Abund Sum % | Calc Abund Sum % |
|---------|----------|----------|------------|---------|--------------|-------------|------------------|
| 1       | 317.1759 | 317.1747 | -3.58      | 100     | 100          | 81.31       | 80.71            |
| 2       | 318.1794 | 318.1781 | -3.95      | 19.59   | 20.99        | 15.93       | 16.94            |
| 3       | 319.1825 | 319.1808 | -5.24      | 3.39    | 2.91         | 2.76        | 2.35             |

--- End Of Report ---

# 4e-1 HNMR

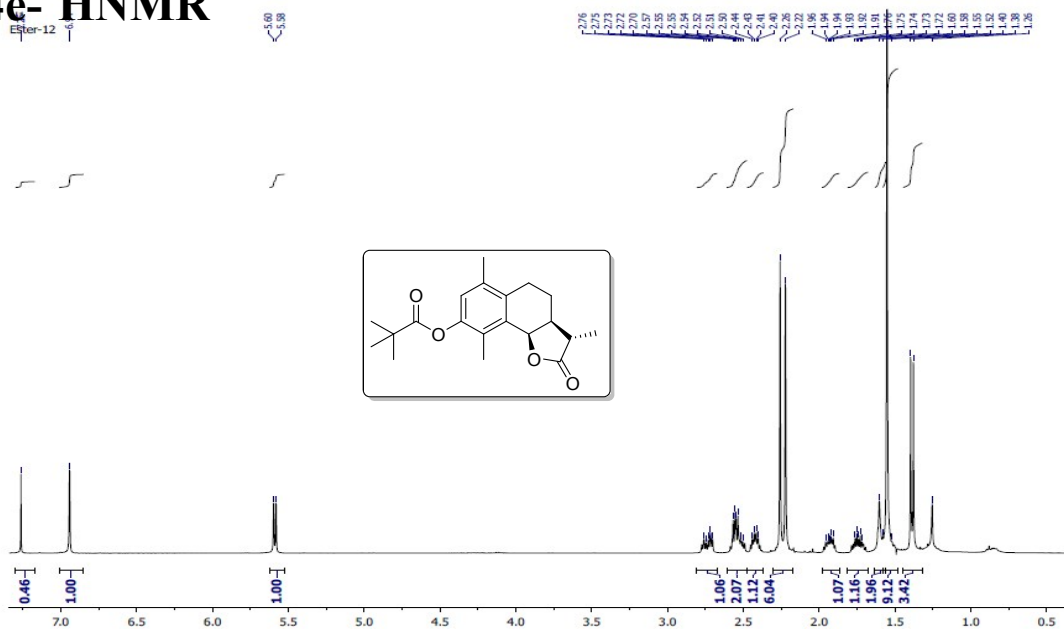

# 4e-13 CNMR

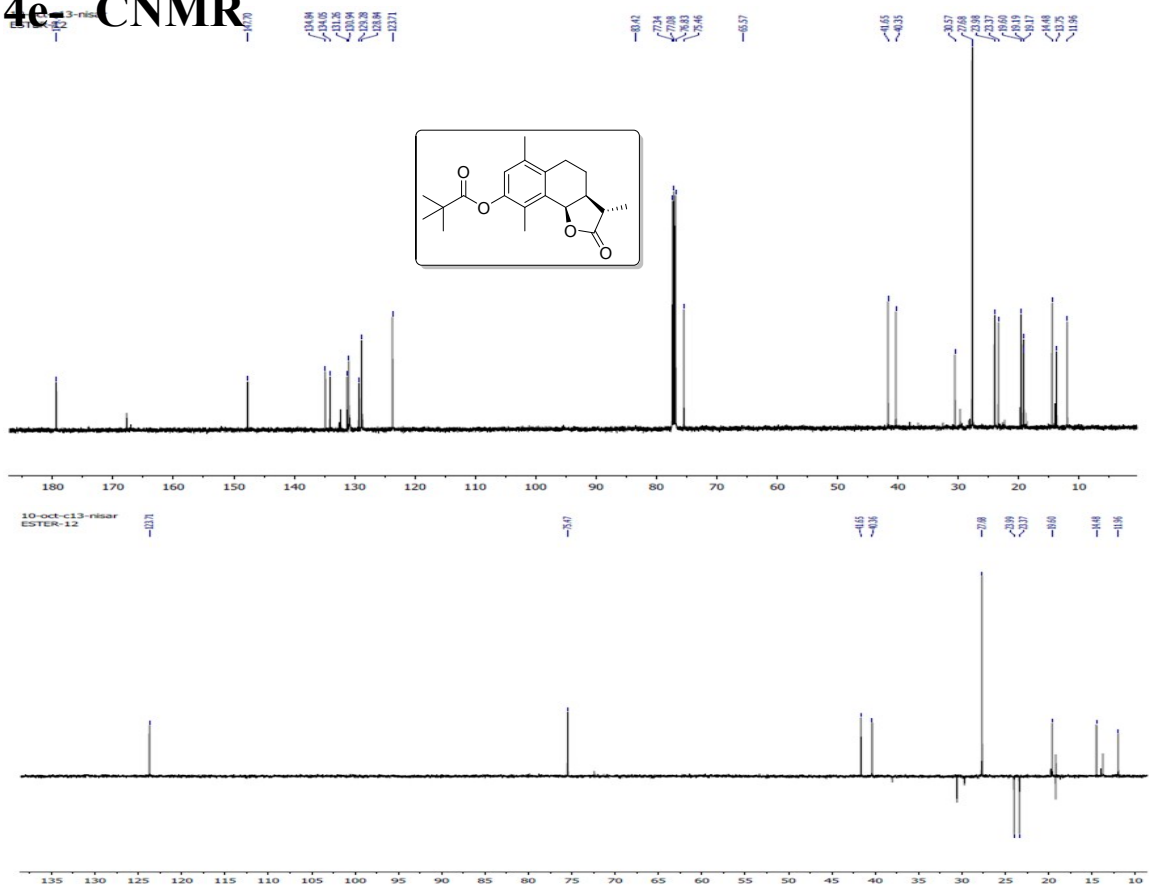

## 4e-HRMS

### Compound Table

| Compound Label     | RT    | Mass     | Formula    | MFG Formula | MFG Diff (ppm) | DB Formula |
|--------------------|-------|----------|------------|-------------|----------------|------------|
| Cpd 33: C20 H26 O4 | 0.341 | 330.1815 | C20 H26 O4 | C20 H26 O4  | 4.9            | C20 H26 O4 |

| Compound Label     | m/z      | RT    | Algorithm                 | Mass     |
|--------------------|----------|-------|---------------------------|----------|
| Cpd 33: C20 H26 O4 | 331.1887 | 0.341 | Find by Molecular Feature | 330.1815 |

### MFE MS Spectrum

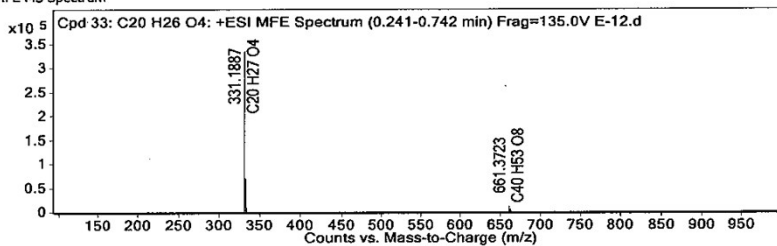

### MS Spectrum Peak List

| m/z      | z | Abund     | Formula    | Ion     |
|----------|---|-----------|------------|---------|
| 331.1887 | 1 | 334444.03 | C20 H27 O4 | (M+H)+  |
| 332.1923 | 1 | 70161.08  | C20 H27 O4 | (M+H)+  |
| 333.195  | 1 | 10302.89  | C20 H27 O4 | (M+H)+  |
| 661.3723 | 1 | 11072.51  | C40 H53 O8 | (2M+H)+ |
| 662.3768 | 1 | 5044.16   | C40 H53 O8 | (2M+H)+ |

### Predicted Isotope Match Table

| Isotope | m/z      | Calc m/z | Diff (ppm) | Abund % | Calc Abund % | Abund Sum % | Calc Abund Sum % |
|---------|----------|----------|------------|---------|--------------|-------------|------------------|
| 1       | 331.1887 | 331.1904 | 4.96       | 100     | 100          | 80.16       | 79.63            |
| 2       | 332.1923 | 332.1938 | 4.51       | 20.98   | 22.09        | 16.82       | 17.59            |
| 3       | 333.195  | 333.1965 | 4.53       | 3.08    | 3.15         | 2.47        | 2.51             |
| 4       | 334.1971 | 334.1992 | 6.41       | 0.69    | 0.34         | 0.56        | 0.27             |

--- End Of Report ---

# 4f-<sup>1</sup>H NMR

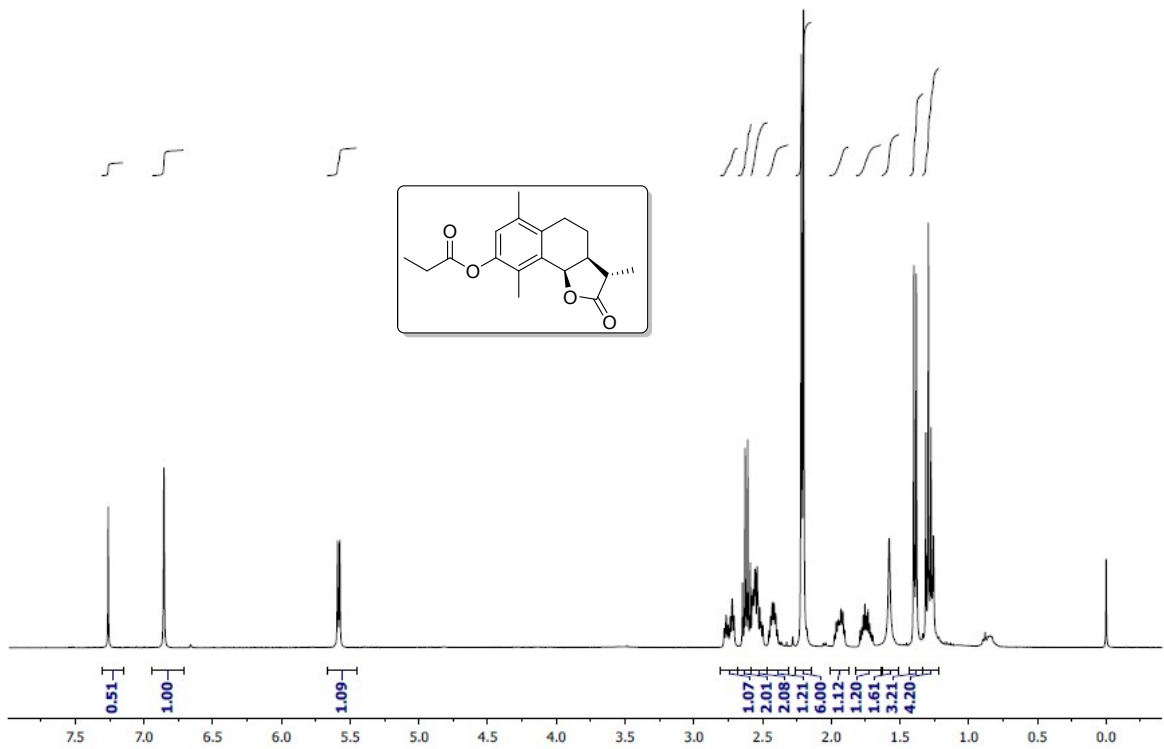

# 4f-HRMS

Compound Table

| Compound Label     | RT    | Mass     | Formula    | MFG Formula | MFG Diff (ppm) | DB Formula |
|--------------------|-------|----------|------------|-------------|----------------|------------|
| Cpd 19: C18 H22 O4 | 0.342 | 302.1523 | C18 H22 O4 | C18 H22 O4  | -1.62          | C18 H22 O4 |

| Compound Label     | m/z      | RT    | Algorithm                 | Mass     |
|--------------------|----------|-------|---------------------------|----------|
| Cpd 19: C18 H22 O4 | 303.1596 | 0.342 | Find by Molecular Feature | 302.1523 |

MFE MS Spectrum

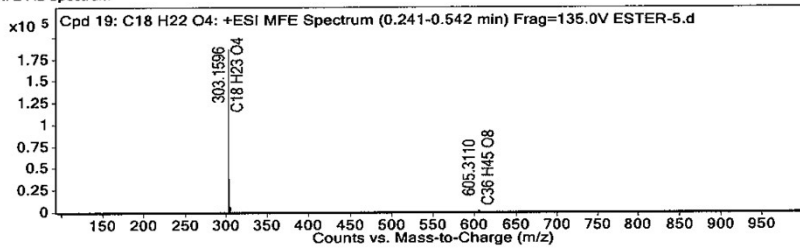

MS Spectrum Peak List

| m/z      | z | Abund     | Formula    | Ion     |
|----------|---|-----------|------------|---------|
| 303.1596 | 1 | 186029.88 | C18 H23 O4 | (M+H)+  |
| 304.1627 | 1 | 37429.66  | C18 H23 O4 | (M+H)+  |
| 305.1659 | 1 | 6819.66   | C18 H23 O4 | (M+H)+  |
| 605.3111 | 1 | 2413.01   | C36 H45 O8 | (2M+H)+ |
| 606.3158 | 1 | 883.95    | C36 H45 O8 | (2M+H)+ |

Predicted Isotope Match Table

| Isotope | m/z      | Calc m/z | Diff (ppm) | Abund % | Calc Abund % | Abund Sum % | Calc Abund Sum % |
|---------|----------|----------|------------|---------|--------------|-------------|------------------|
| 1       | 303.1596 | 303.1591 | -1.79      | 100     | 100          | 80.78       | 81.58            |
| 2       | 304.1627 | 304.1625 | -0.56      | 20.12   | 19.89        | 16.25       | 16.22            |
| 3       | 305.1659 | 305.1651 | -2.54      | 3.67    | 2.69         | 2.96        | 2.2              |

--- End Of Report ---



# 4g-<sup>13</sup>C NMR

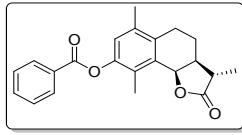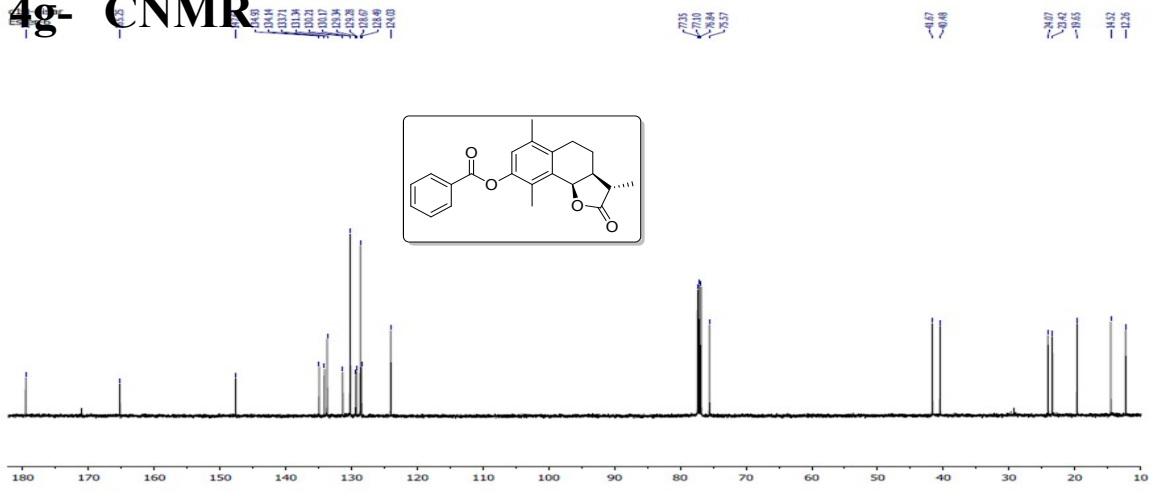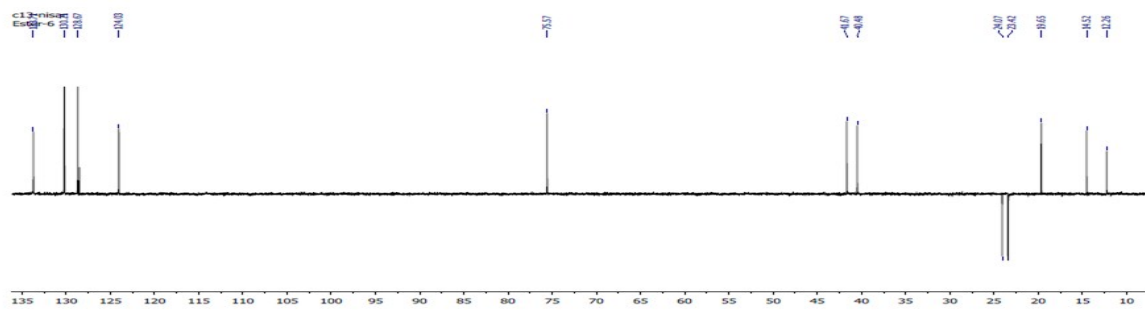

# 4g-HRMS

Compound Table

| Compound Label     | RT    | Mass     | Formula    | MFG Formula | MFG Diff (ppm) | DB Formula |
|--------------------|-------|----------|------------|-------------|----------------|------------|
| Cpd 18: C22 H22 O4 | 0.341 | 350.1525 | C22 H22 O4 | C22 H22 O4  | -1.91          | C22 H22 O4 |

| Compound Label     | m/z      | RT    | Algorithm                 | Mass     |
|--------------------|----------|-------|---------------------------|----------|
| Cpd 18: C22 H22 O4 | 351.1597 | 0.341 | Find by Molecular Feature | 350.1525 |

MFE MS Spectrum

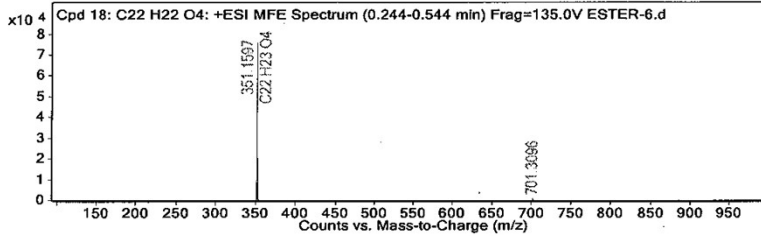

MS Spectrum Peak List

| m/z      | z | Abund    | Formula    | Ion     |
|----------|---|----------|------------|---------|
| 351.1597 | 1 | 75530.73 | C22 H23 O4 | (M+H)+  |
| 352.1631 | 1 | 20453.84 | C22 H23 O4 | (M+H)+  |
| 353.1665 | 1 | 3656.73  | C22 H23 O4 | (M+H)+  |
| 701.3096 | 1 | 807.34   |            | (2M+H)+ |
| 702.3148 | 1 | 583.45   |            | (2M+H)+ |

Predicted Isotope Match Table

| Isotope | m/z      | Calc m/z | Diff (ppm) | Abund % | Calc Abund % | Abund Sum % | Calc Abund Sum % |
|---------|----------|----------|------------|---------|--------------|-------------|------------------|
| 1       | 351.1597 | 351.1591 | -1.88      | 100     | 100          | 75.44       | 77.98            |
| 2       | 352.1631 | 352.1625 | -1.7       | 27.08   | 24.21        | 20.43       | 18.88            |
| 3       | 353.1665 | 353.1653 | -3.33      | 4.84    | 3.62         | 3.65        | 2.83             |
| 4       | 354.1692 | 354.168  | -3.3       | 0.63    | 0.41         | 0.48        | 0.32             |

--- End Of Report ---

# 4h-<sup>1</sup>H NMR

H1  
Ester-3

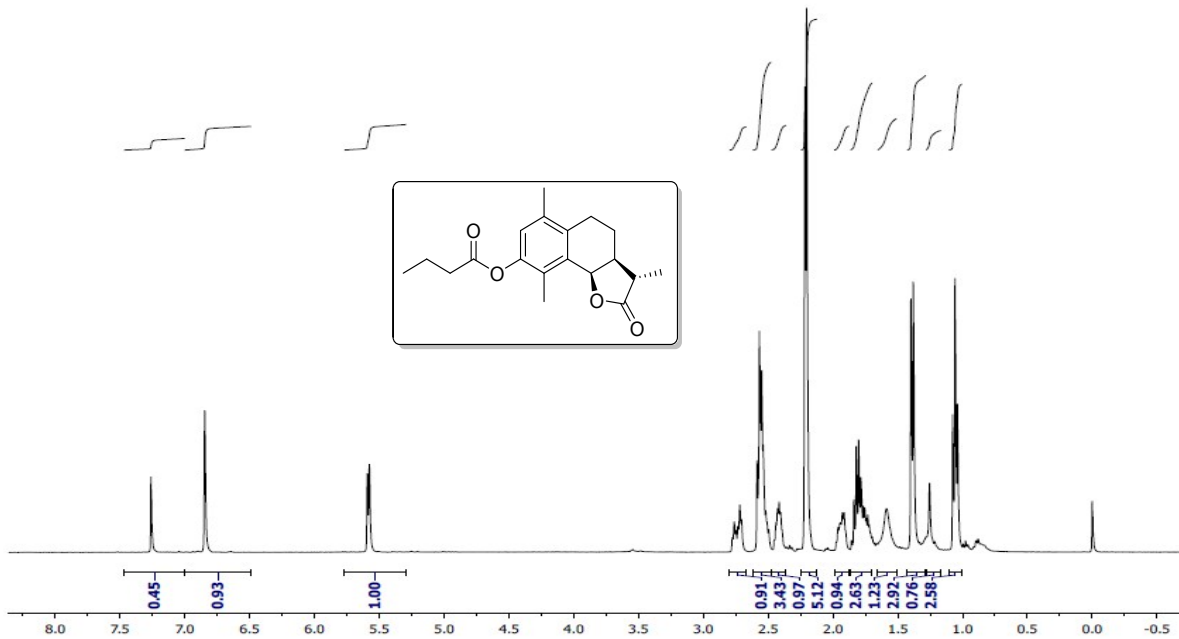

# 4h-<sup>13</sup>CNMR

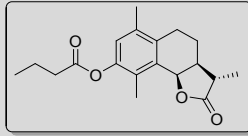

## 4h-HRMS

Compound Table

| Compound Label     | RT    | Mass     | Formula    | MFG Formula | MFG Diff (ppm) | DB Formula |
|--------------------|-------|----------|------------|-------------|----------------|------------|
| Cpd 40: C19 H24 O4 | 0.344 | 316.1706 | C19 H24 O4 | C19 H24 O4  | -9.8           | C19 H24 O4 |

| Compound Label     | m/z      | RT    | Algorithm                 | Mass     |
|--------------------|----------|-------|---------------------------|----------|
| Cpd 40: C19 H24 O4 | 317.1779 | 0.344 | Find by Molecular Feature | 316.1706 |

MFE MS Spectrum

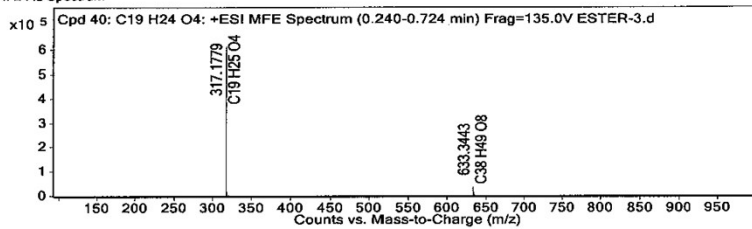

MS Spectrum Peak List

| m/z      | z | Abund     | Formula    | Ion     |
|----------|---|-----------|------------|---------|
| 317.1779 | 1 | 614381.19 | C19 H25 O4 | (M+H)+  |
| 318.1808 | 1 | 115471.52 | C19 H25 O4 | (M+H)+  |
| 319.1834 | 1 | 16288.95  | C19 H25 O4 | (M+H)+  |
| 633.3443 | 1 | 33324.07  | C38 H49 O8 | (2M+H)+ |
| 634.3478 | 1 | 14670.79  | C38 H49 O8 | (2M+H)+ |

Predicted Isotope Match Table

| Isotope | m/z      | Calc m/z | Diff (ppm) | Abund % | Calc Abund % | Abund Sum % | Calc Abund Sum % |
|---------|----------|----------|------------|---------|--------------|-------------|------------------|
| 1       | 317.1779 | 317.1747 | -10.05     | 100     | 100          | 81.99       | 80.49            |
| 2       | 318.1808 | 318.1781 | -8.41      | 18.79   | 20.99        | 15.41       | 16.9             |
| 3       | 319.1834 | 319.1808 | -8.22      | 2.65    | 2.91         | 2.17        | 2.35             |
| 4       | 320.1875 | 320.1835 | -12.59     | 0.44    | 0.3          | 0.36        | 0.24             |
| 5       | 321.1868 | 321.1861 | -2.12      | 0.08    | 0.03         | 0.06        | 0.02             |

--- End Of Report ---



# 5-<sup>1</sup>H NMR

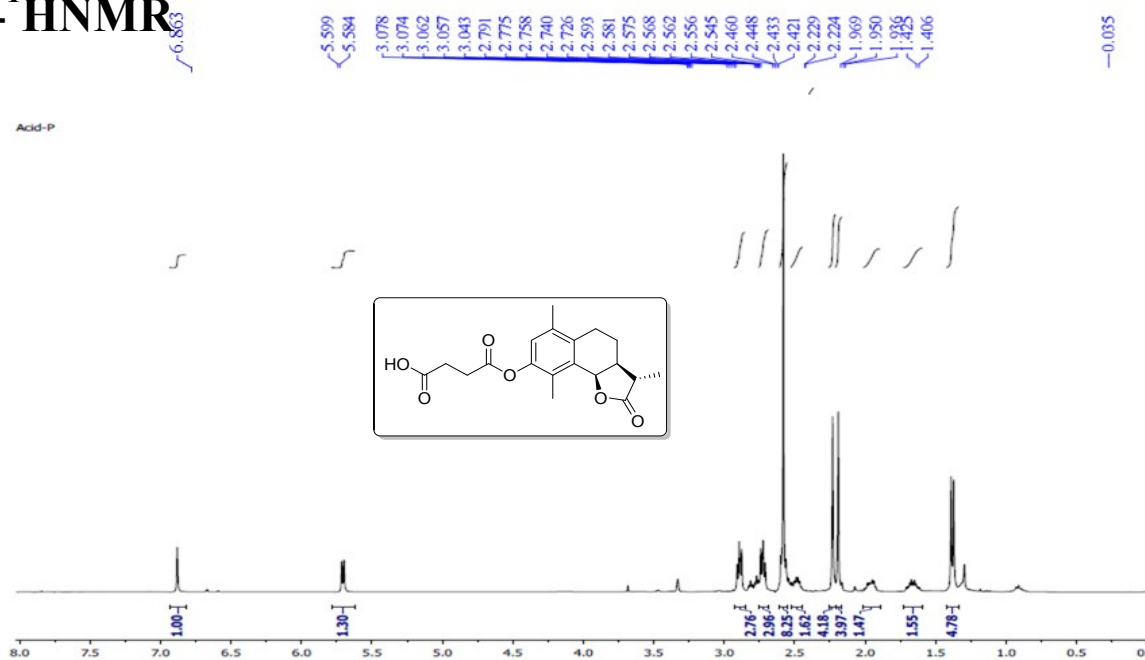

# 5-<sup>13</sup>C NMR

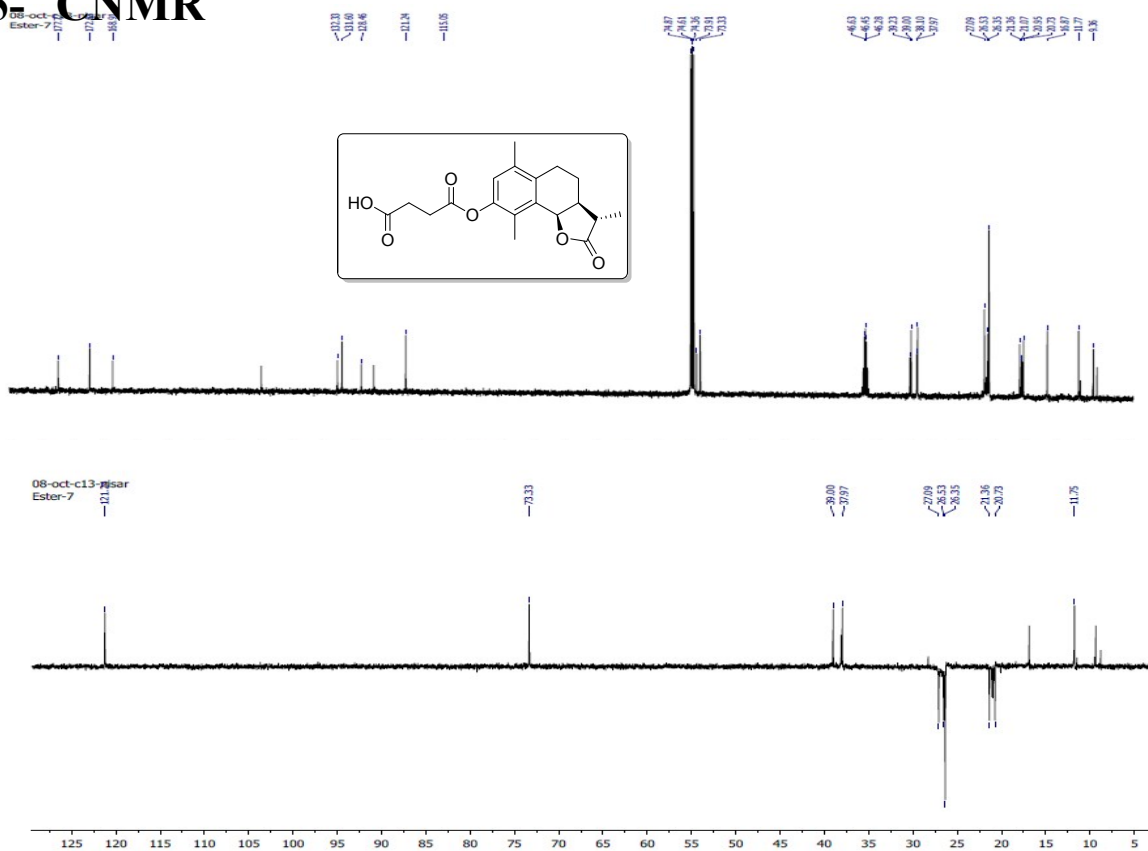

# 5-HRMS

## Compound Table

| Compound Label     | RT    | Mass    | Formula    | MFG Formula | MFG Diff (ppm) | DB Formula |
|--------------------|-------|---------|------------|-------------|----------------|------------|
| Cpd 62: C19 H22 O6 | 0.359 | 346.143 | C19 H22 O6 | C19 H22 O6  | -4.03          | C19 H22 O6 |

| Compound Label     | m/z      | RT    | Algorithm                 | Mass    |
|--------------------|----------|-------|---------------------------|---------|
| Cpd 62: C19 H22 O6 | 347.1524 | 0.359 | Find by Molecular Feature | 346.143 |

## MFE MS Spectrum

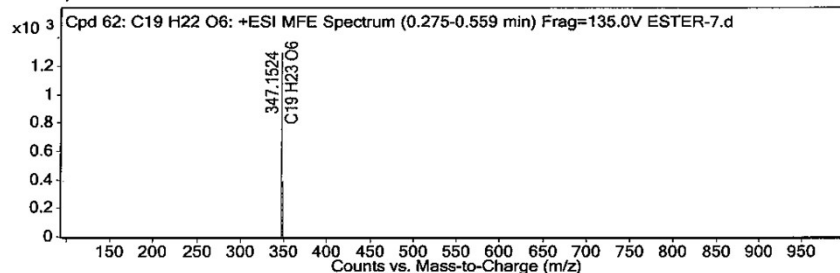

## MS Spectrum Peak List

| m/z      | z | Abund   | Formula    | Ion    |
|----------|---|---------|------------|--------|
| 347.1524 | 1 | 1293.18 | C19 H23 O6 | (M+H)+ |
| 348.1537 | 1 | 387.41  | C19 H23 O6 | (M+H)+ |
| 349.1446 | 1 | 239.88  | C19 H23 O6 | (M+H)+ |

## Predicted Isotope Match Table

| Isotope | m/z      | Calc m/z | Diff (ppm) | Abund % | Calc Abund % | Abund Sum % | Calc Abund Sum % |
|---------|----------|----------|------------|---------|--------------|-------------|------------------|
| 1       | 347.1524 | 347.1489 | -10.15     | 100     | 100          | 67.34       | 80.4             |
| 2       | 348.1537 | 348.1523 | -4.05      | 29.96   | 21.04        | 20.17       | 16.92            |
| 3       | 349.1446 | 349.1548 | 29.01      | 18.55   | 3.34         | 12.49       | 2.68             |

--- End Of Report ---

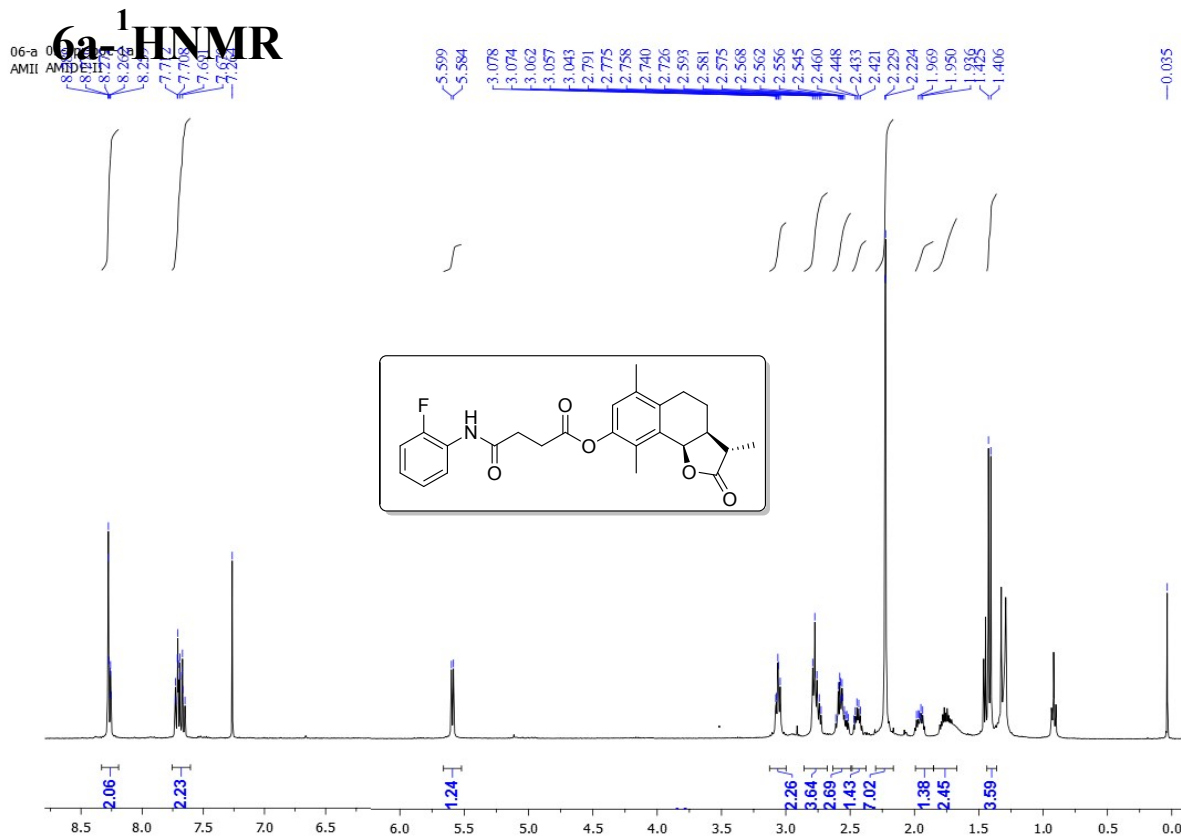

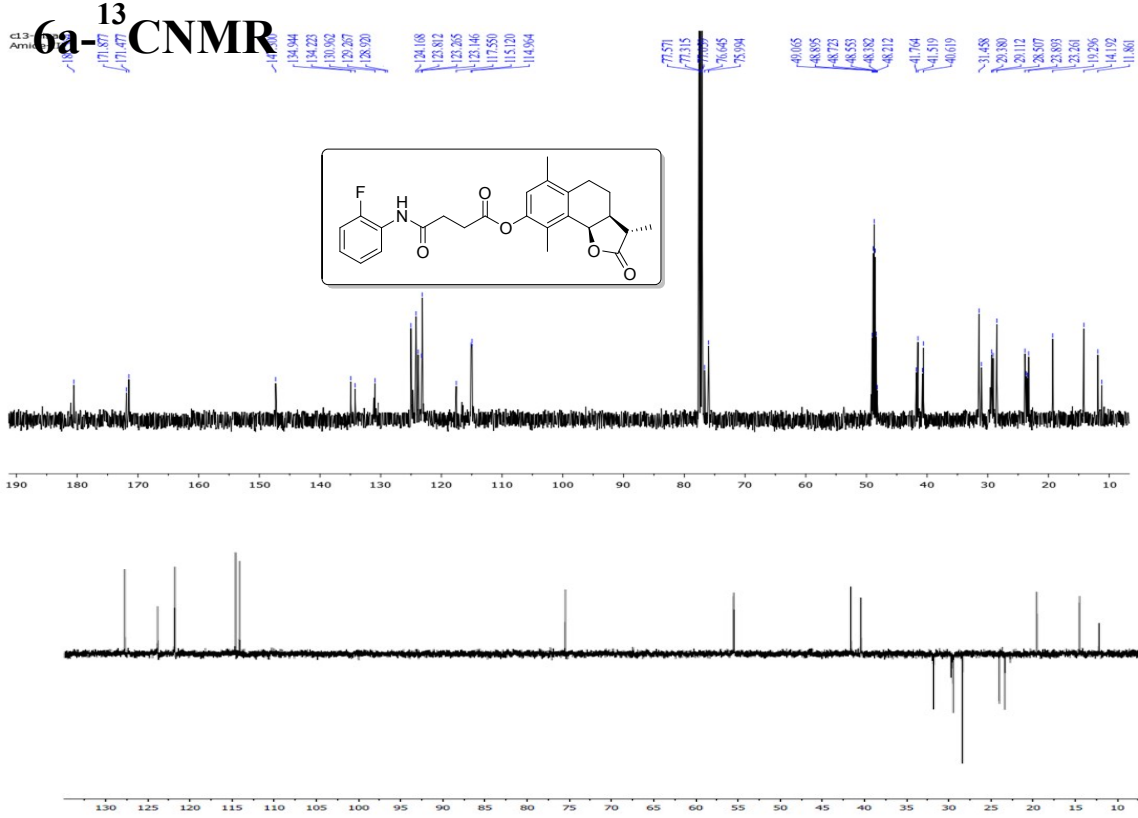

## 6a-HRMS

### Compound Table

| Compound Label                                             | RT    | Mass     | Formula                                            | MFG Formula                                        | MFG Diff (ppm) | DB Formula                                         |
|------------------------------------------------------------|-------|----------|----------------------------------------------------|----------------------------------------------------|----------------|----------------------------------------------------|
| Cpd 26: C <sub>25</sub> H <sub>26</sub> F N O <sub>5</sub> | 0.339 | 439.1835 | C <sub>25</sub> H <sub>26</sub> F N O <sub>5</sub> | C <sub>25</sub> H <sub>26</sub> F N O <sub>5</sub> | -9.08          | C <sub>25</sub> H <sub>26</sub> F N O <sub>5</sub> |

| Compound Label                                             | m/z      | RT    | Algorithm                 | Mass     |
|------------------------------------------------------------|----------|-------|---------------------------|----------|
| Cpd 26: C <sub>25</sub> H <sub>26</sub> F N O <sub>5</sub> | 440.1908 | 0.339 | Find by Molecular Feature | 439.1835 |

### MFE MS Spectrum

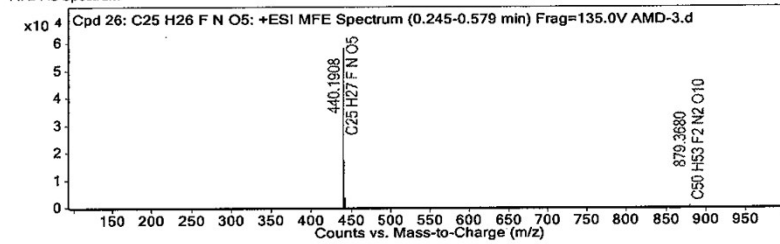

### MS Spectrum Peak List

| m/z      | z | Abund    | Formula                                                                       | Ion                 |
|----------|---|----------|-------------------------------------------------------------------------------|---------------------|
| 440.1908 | 1 | 58052.72 | C <sub>25</sub> H <sub>27</sub> F N O <sub>5</sub>                            | (M+H) <sup>+</sup>  |
| 441.1942 | 1 | 17473.34 | C <sub>25</sub> H <sub>27</sub> F N O <sub>5</sub>                            | (M+H) <sup>+</sup>  |
| 442.1962 | 1 | 3446.66  | C <sub>25</sub> H <sub>27</sub> F N O <sub>5</sub>                            | (M+H) <sup>+</sup>  |
| 443.1995 | 1 | 499.52   | C <sub>25</sub> H <sub>27</sub> F N O <sub>5</sub>                            | (M+H) <sup>+</sup>  |
| 879.3680 | 1 | 712.17   | C <sub>50</sub> H <sub>53</sub> F <sub>2</sub> N <sub>2</sub> O <sub>10</sub> | (2M+H) <sup>+</sup> |

### Predicted Isotope Match Table

| Isotope | m/z      | Calc m/z | Diff (ppm) | Abund % | Calc Abund % | Abund Sum % | Calc Abund Sum % |
|---------|----------|----------|------------|---------|--------------|-------------|------------------|
| 1       | 440.1908 | 440.1868 | -9.04      | 100     | 100          | 73.05       | 75.03            |
| 2       | 441.1942 | 441.1901 | -9.38      | 30.1    | 27.91        | 21.99       | 20.94            |
| 3       | 442.1962 | 442.1929 | -7.57      | 5.94    | 4.77         | 4.34        | 3.58             |
| 4       | 443.1995 | 443.1956 | -8.81      | 0.86    | 0.61         | 0.63        | 0.46             |

--- End Of Report ---

6b-<sup>1</sup>H-NMR

6b

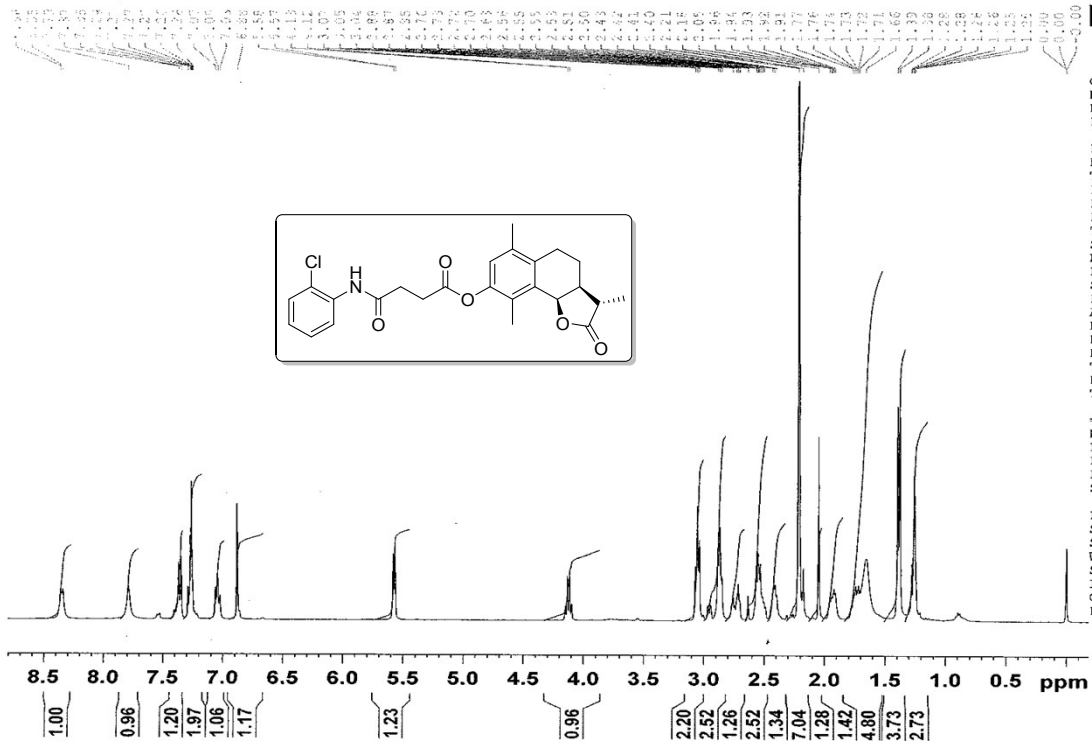

BI  
 CURR  
 NAME  
 EXPNO  
 PROCN  
 F2 -  
 Date -  
 Time -  
 INSTR  
 PROBHD  
 PULPR  
 TD  
 SOLVE  
 NS  
 DS  
 SWH  
 FIDRE  
 AQ  
 RG  
 DW  
 DE  
 TE  
 D1  
 TDO  
 =====  
 NUC1  
 P1  
 PL1  
 PL1W  
 SFO1  
 F2 -  
 SI  
 SF  
 WDW  
 SSB  
 LB  
 GB  
 PC

6b-<sup>13</sup>C-NMR

MR

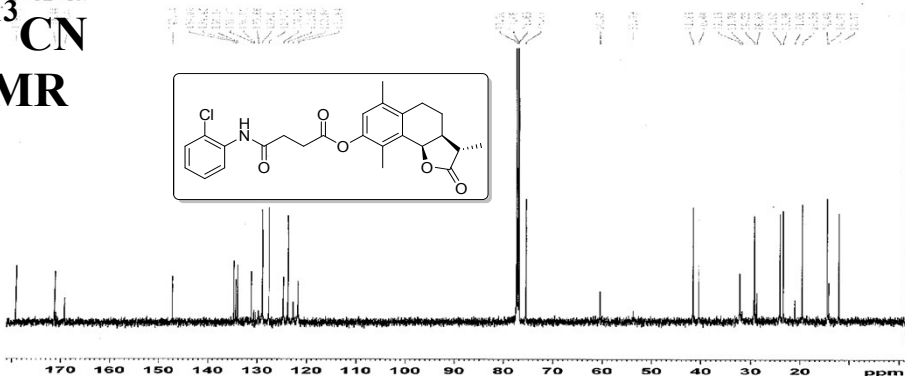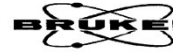

Current Data Parameters  
 NAME: c13-pr  
 EXPNO: 201  
 PROCNO: 2  
 F2 - Acquisition Pa  
 DATE\_: 2011  
 TIME: 10:42  
 INSTRUM: spect  
 PROBHD: 5 mm BBO  
 PULPROG: zgpg30  
 TD: 65536  
 SOLVENT: dms  
 NS: 2048  
 DS: 4  
 SWH: 31446  
 FIDRES: 0.242  
 AQ: 1.947  
 RG: 19  
 DW: 13  
 DE: 6  
 TE: 120.000  
 D1: 0.0000  
 d11: 0.0000  
 DELTA: 0.9999  
 FDO: 125.770  
 SFO1: 125.770  
 P1: 1.0000  
 PL1: -1.0000  
 SFO2: 500.132  
 NUC2: wa  
 P2PRG2: wa  
 PCPRG2: wa  
 PLW2: -1.0000  
 PLW1: -1.0000  
 SFO3: 125.757  
 F2 - Processing pa  
 SI: 3  
 SF: 125.757  
 WDW: 0  
 SSB: 0  
 LB: 0  
 GB: 0  
 PC: 0

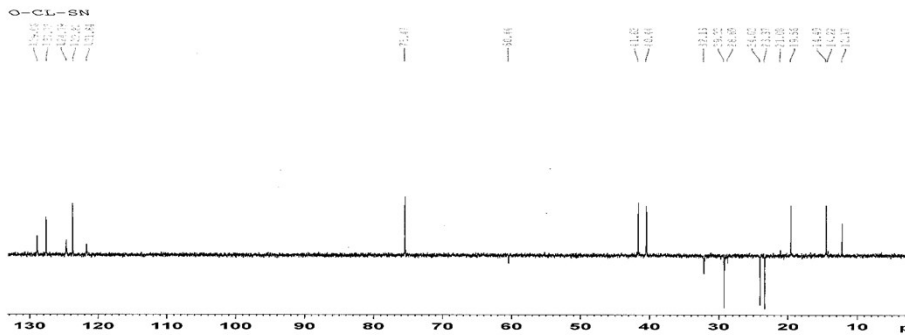

NAME: c13-pr  
 EXPNO: 201  
 PROCNO: 2  
 F2 - Acquisition Pa  
 DATE\_: 2011  
 TIME: 10:42  
 INSTRUM: spect  
 PROBHD: 5 mm BBO  
 PULPROG: zgpg30  
 TD: 65536  
 SOLVENT: dms  
 NS: 2048  
 DS: 4  
 SWH: 3003  
 FIDRES: 0.4  
 AQ: 1.09  
 RG: 19  
 DW: 13  
 DE: 6  
 TE: 120.000  
 CRST2: 145.00  
 DS: 0.0000  
 d11: 0.0000  
 d12: 0.0000  
 DELTA: 0.9999  
 FDO: 125.770  
 SFO1: 125.770  
 NUC1: wa  
 PLW1: -1.0000  
 SFO2: 500.132  
 NUC2: wa  
 PCPRG2: wa  
 PLW2: -1.0000  
 PLW12: -1.0000  
 F2 - Processing pa  
 SI: 3  
 SF: 125.757  
 WDW: 0  
 SSB: 0  
 LB: 0  
 GB: 0  
 PC: 0

# 6b-HRMS

Compound Table

| Compound Label                                             | RT    | Mass     | Formula                                            | MFG Formula                                        | MFG Diff (ppm) | DB Formula                                         |
|------------------------------------------------------------|-------|----------|----------------------------------------------------|----------------------------------------------------|----------------|----------------------------------------------------|
| Cpd 22: C <sub>25</sub> H <sub>26</sub> ClN O <sub>5</sub> | 0.338 | 455.1517 | C <sub>25</sub> H <sub>26</sub> ClN O <sub>5</sub> | C <sub>25</sub> H <sub>26</sub> ClN O <sub>5</sub> | -3.75          | C <sub>25</sub> H <sub>26</sub> ClN O <sub>5</sub> |

| Compound Label                                             | m/z      | RT    | Algorithm                 | Mass     |
|------------------------------------------------------------|----------|-------|---------------------------|----------|
| Cpd 22: C <sub>25</sub> H <sub>26</sub> ClN O <sub>5</sub> | 456.1589 | 0.338 | Find by Molecular Feature | 455.1517 |

MFE MS Spectrum

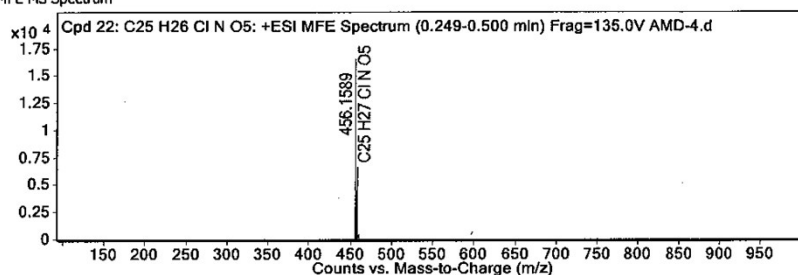

MS Spectrum Peak List

| m/z      | z | Abund    | Formula                                            | Ion                |
|----------|---|----------|----------------------------------------------------|--------------------|
| 456.1589 | 1 | 16546.83 | C <sub>25</sub> H <sub>27</sub> ClN O <sub>5</sub> | (M+H) <sup>+</sup> |
| 457.1622 | 1 | 4492.13  | C <sub>25</sub> H <sub>27</sub> ClN O <sub>5</sub> | (M+H) <sup>+</sup> |
| 458.1571 | 1 | 6651.85  | C <sub>25</sub> H <sub>27</sub> ClN O <sub>5</sub> | (M+H) <sup>+</sup> |
| 459.1601 | 1 | 1729.21  | C <sub>25</sub> H <sub>27</sub> ClN O <sub>5</sub> | (M+H) <sup>+</sup> |
| 460.1649 | 1 | 426.22   | C <sub>25</sub> H <sub>27</sub> ClN O <sub>5</sub> | (M+H) <sup>+</sup> |

Predicted Isotope Match Table

| Isotope | m/z      | Calc m/z | Diff (ppm) | Abund % | Calc Abund % | Abund Sum % | Calc Abund Sum % |
|---------|----------|----------|------------|---------|--------------|-------------|------------------|
| 1       | 456.1589 | 456.1572 | -3.62      | 100     | 100          | 55.44       | 56.88            |
| 2       | 457.1622 | 457.1605 | -3.7       | 27.15   | 27.91        | 15.05       | 15.87            |
| 3       | 458.1571 | 458.1555 | -3.54      | 40.2    | 36.77        | 22.29       | 20.92            |
| 4       | 459.1601 | 459.1581 | -4.36      | 10.45   | 9.54         | 5.79        | 5.42             |
| 5       | 460.1649 | 460.1607 | -9.05      | 2.58    | 1.59         | 1.43        | 0.9              |

--- End Of Report ---

# 6c-

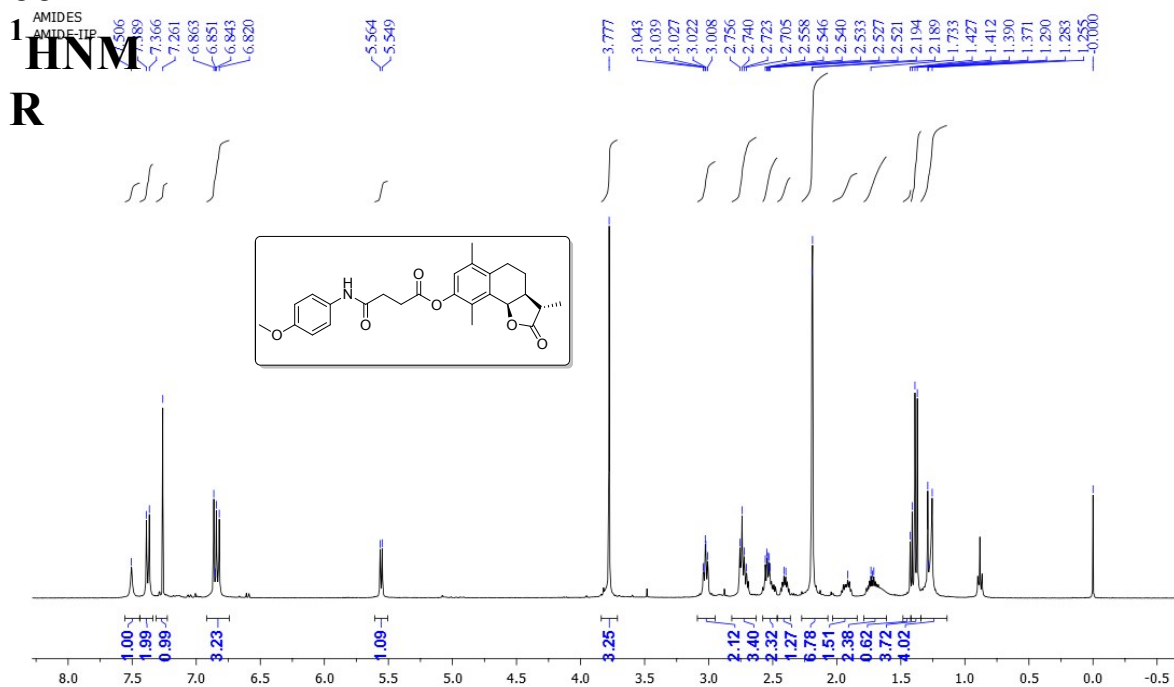

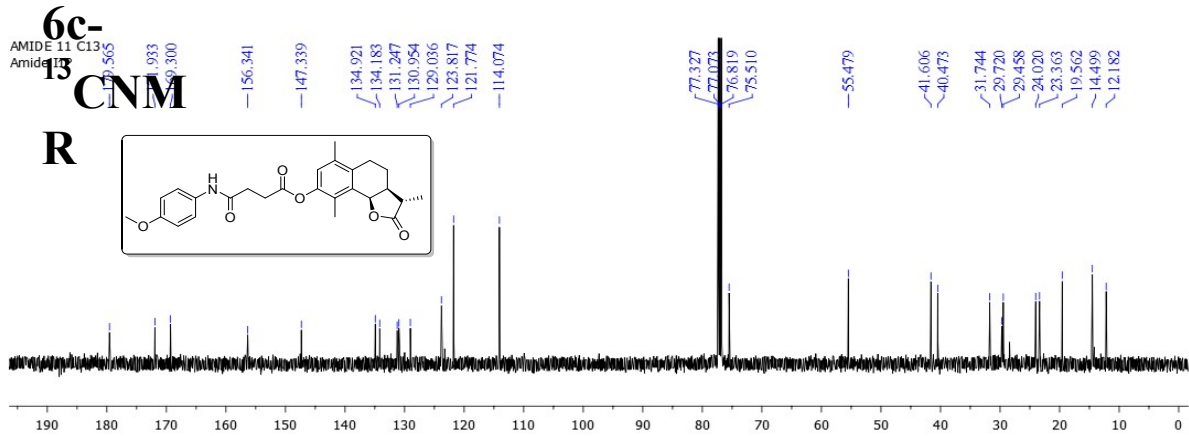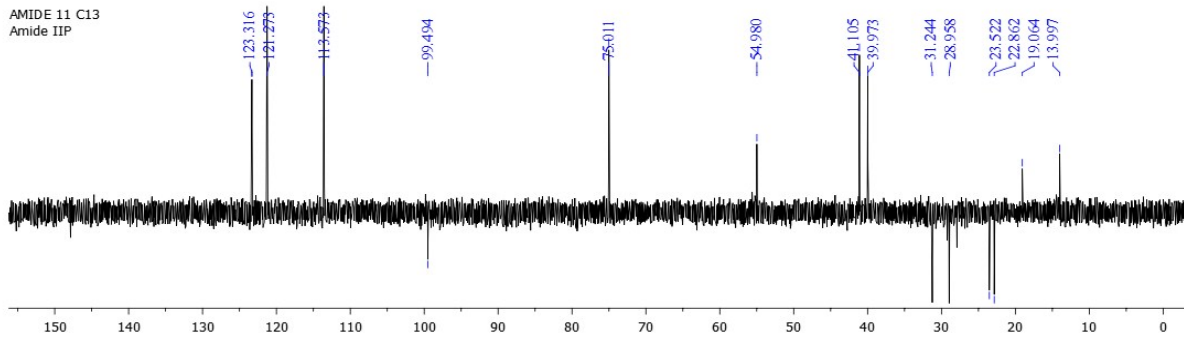

**6c-  
HRMS**

| Compound Label       | RT    | Mass    | Formula      | MFG Formula  | MFG Diff (ppm) | DB Formula   |
|----------------------|-------|---------|--------------|--------------|----------------|--------------|
| Cpd 38: C26 H29 N O6 | 0.341 | 451.202 | C26 H29 N O6 | C26 H29 N O6 | -5.57          | C26 H29 N O6 |

| Compound Label       | m/z      | RT    | Algorithm                 | Mass    |
|----------------------|----------|-------|---------------------------|---------|
| Cpd 38: C26 H29 N O6 | 452.2093 | 0.341 | Find by Molecular Feature | 451.202 |

MFE MS Spectrum

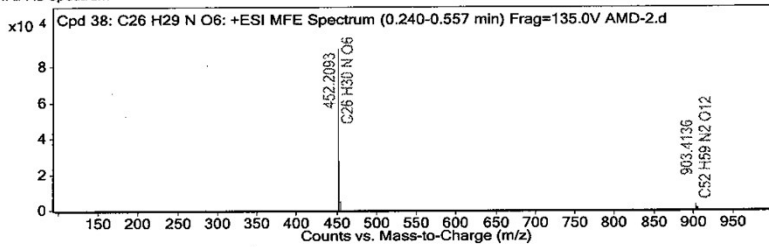

MS Spectrum Peak List

| m/z      | z | Abund    | Formula        | Ion     |
|----------|---|----------|----------------|---------|
| 452.2093 | 1 | 89683.57 | C26 H30 N O6   | (M+H)+  |
| 453.2126 | 1 | 27589.89 | C26 H30 N O6   | (M+H)+  |
| 454.2153 | 1 | 5104.69  | C26 H30 N O6   | (M+H)+  |
| 903.4136 | 1 | 3224.48  | C52 H59 N2 O12 | (2M+H)+ |
| 904.415  | 1 | 1707.49  | C52 H59 N2 O12 | (2M+H)+ |

Predicted Isotope Match Table

| Isotope | m/z      | Calc m/z | Diff (ppm) | Abund % | Calc Abund % | Abund Sum % | Calc Abund Sum % |
|---------|----------|----------|------------|---------|--------------|-------------|------------------|
| 1       | 452.2093 | 452.2068 | -5.51      | 100     | 100          | 72.47       | 74.03            |
| 2       | 453.2126 | 453.2101 | -5.45      | 30.76   | 29.06        | 22.3        | 21.51            |
| 3       | 454.2153 | 454.2128 | -5.42      | 5.69    | 5.3          | 4.13        | 3.93             |
| 4       | 455.2208 | 455.2155 | -11.65     | 1.52    | 0.72         | 1.1         | 0.54             |

--- End Of Report ---



# 7a-<sup>1</sup>H NMR

CH3 SN

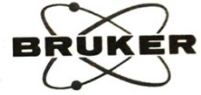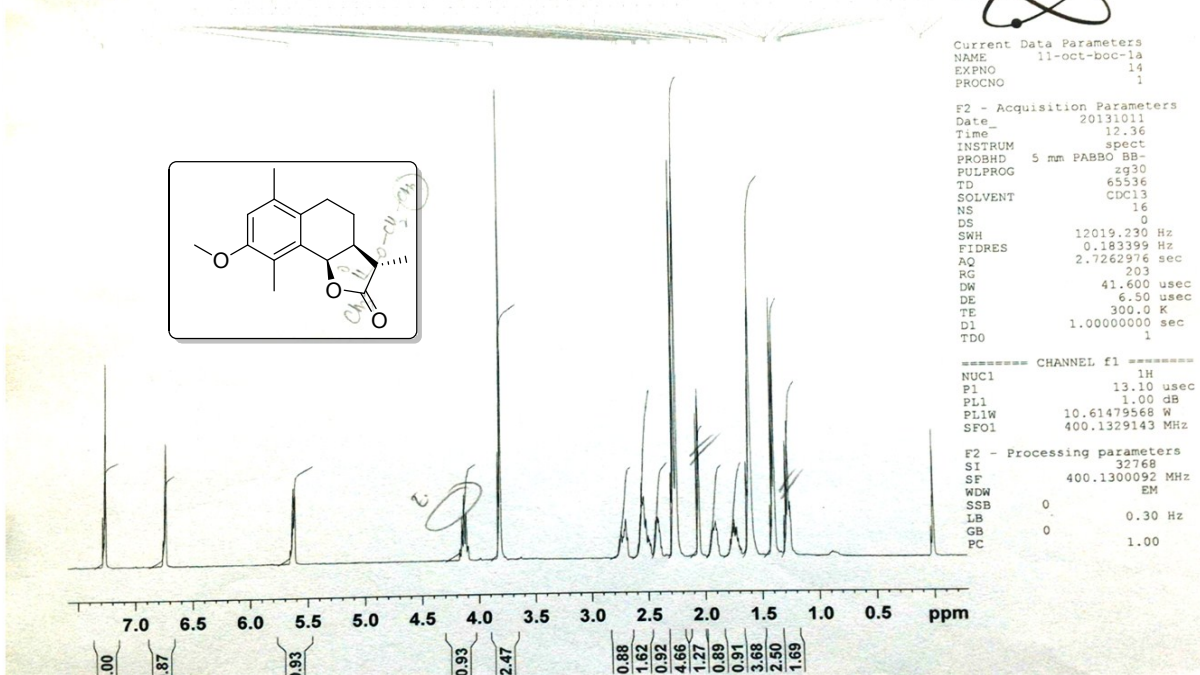

Current Data Parameters  
 NAME 11-oct-boc-1a  
 EXPNO 14  
 PROCNO 1

F2 - Acquisition Parameters  
 Date 20131011  
 Time 12.36  
 INSTRUM spect  
 PROBHD 5 mm PABBO BB-  
 PULPROG zg30  
 TD 65536  
 SOLVENT CDC13  
 NS 16  
 DS 0  
 SWH 12019.230 Hz  
 FIDRES 0.183399 Hz  
 AQ 2.7262976 sec  
 RG 203  
 DW 41.600 usec  
 DE 6.50 usec  
 TE 300.0 K  
 D1 1.00000000 sec  
 TDO 1

----- CHANNEL f1 -----  
 NUC1 1H  
 P1 13.10 usec  
 PL1 1.00 dB  
 PL1W 10.61479568 W  
 SFO1 400.1329143 MHz

F2 - Processing parameters  
 SI 32768  
 SF 400.1300092 MHz  
 WDW EM  
 SSB 0  
 LB 0.30 Hz  
 GB 0  
 PC 1.00

# 7a-<sup>13</sup>C NMR

benzyl and methyl SN 13C  
 CH3-Sn

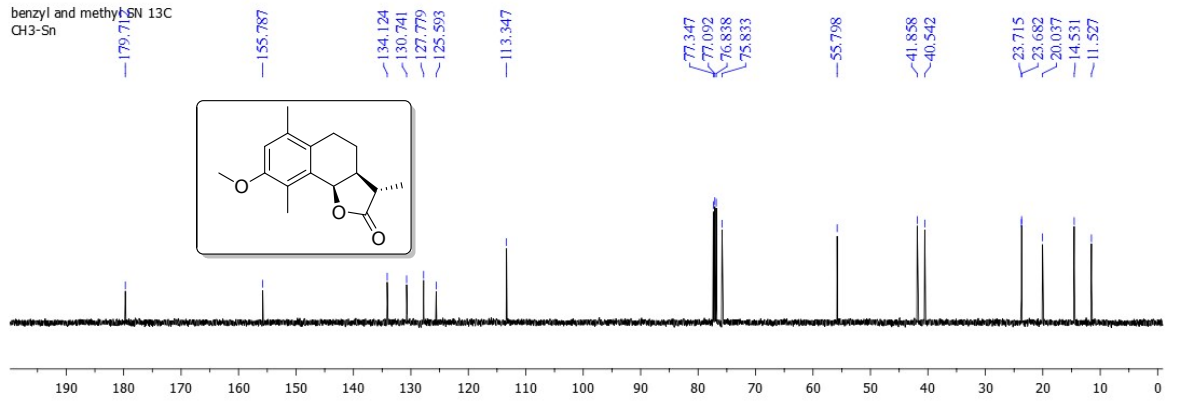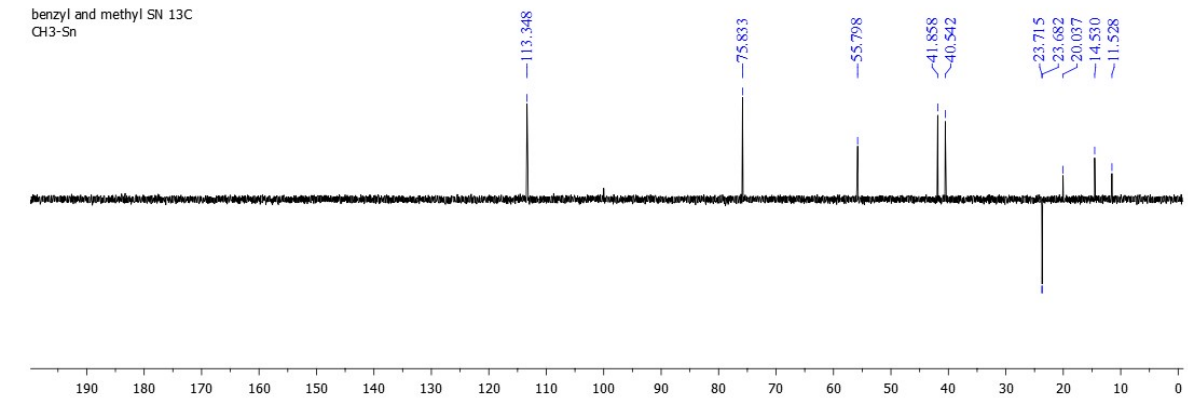

# 7a- HRMS

Compound Table

| Compound Label     | RT    | Mass     | Formula    | MFG Formula | MFG Diff (ppm) | DB Formula |
|--------------------|-------|----------|------------|-------------|----------------|------------|
| Cpd 35: C16 H20 O3 | 0.342 | 260.1418 | C16 H20 O3 | C16 H20 O3  | -2.16          | C16 H20 O3 |

| Compound Label     | m/z      | RT    | Algorithm                 | Mass     |
|--------------------|----------|-------|---------------------------|----------|
| Cpd 35: C16 H20 O3 | 261.1491 | 0.342 | Find by Molecular Feature | 260.1418 |

MFE MS Spectrum

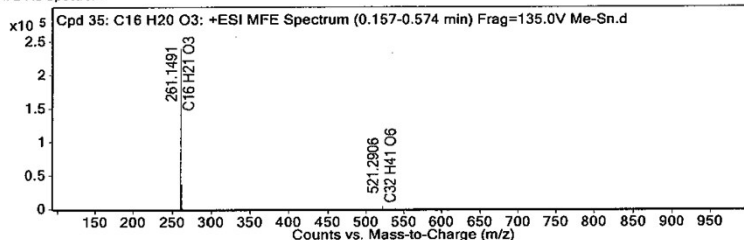

MS Spectrum Peak List

| m/z      | z | Abund     | Formula    | Ion     |
|----------|---|-----------|------------|---------|
| 261.1491 | 1 | 239147.03 | C16 H21 O3 | (M+H)+  |
| 262.1524 | 1 | 37327.34  | C16 H21 O3 | (M+H)+  |
| 263.1557 | 1 | 4625.03   | C16 H21 O3 | (M+H)+  |
| 521.2906 | 1 | 3571.02   | C32 H41 O6 | (2M+H)+ |
| 522.2935 | 1 | 1096.33   | C32 H41 O6 | (2M+H)+ |

Predicted Isotope Match Table

| Isotope | m/z      | Calc m/z | Diff (ppm) | Abund % | Calc Abund % | Abund Sum % | Calc Abund Sum % |
|---------|----------|----------|------------|---------|--------------|-------------|------------------|
| 1       | 261.1491 | 261.1485 | -2.13      | 100     | 100          | 84.84       | 83.38            |
| 2       | 262.1524 | 262.1519 | -1.99      | 15.61   | 17.66        | 13.24       | 14.73            |
| 3       | 263.1557 | 263.1546 | -4.28      | 1.93    | 2.08         | 1.64        | 1.74             |
| 4       | 264.1582 | 264.1572 | -3.77      | 0.32    | 0.18         | 0.27        | 0.15             |

--- End Of Report ---

# 7b-<sup>1</sup>H NMR

Ethyl sn 1h and 13c  
Ethyl-Sn

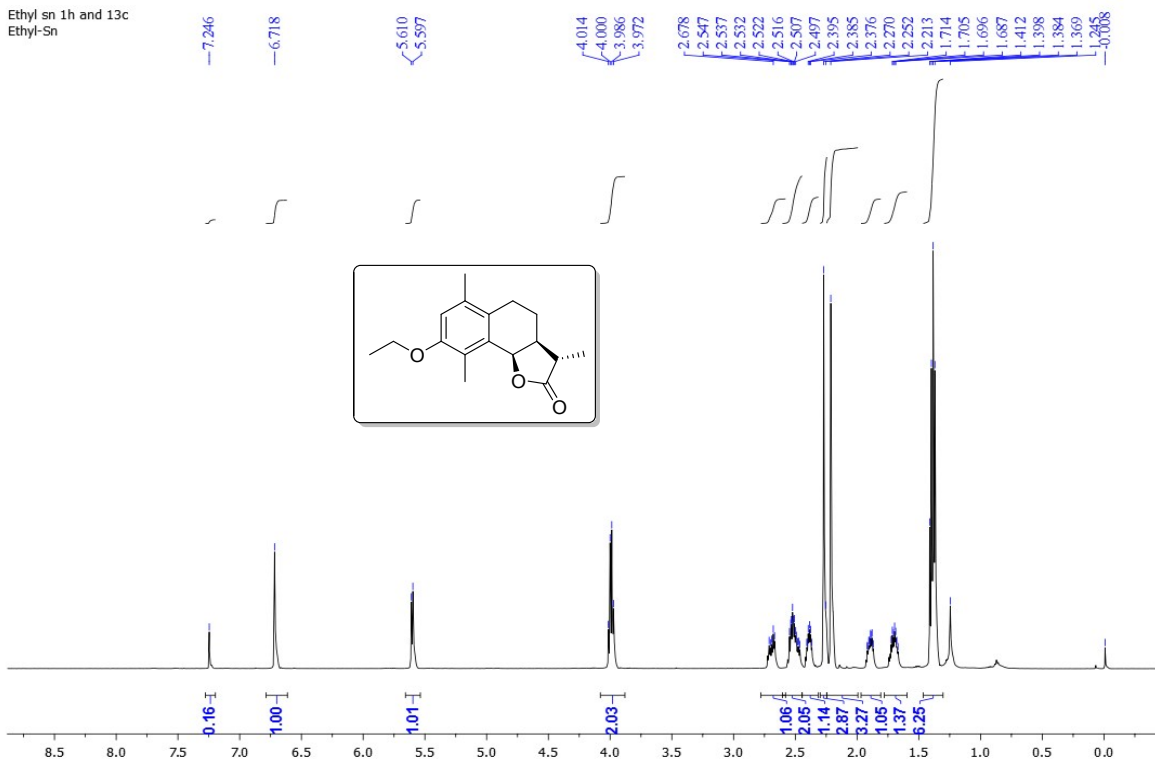



# 7b-<sup>13</sup>C NMR

Ethyl sn 1H and 13C Ethyl-Sn

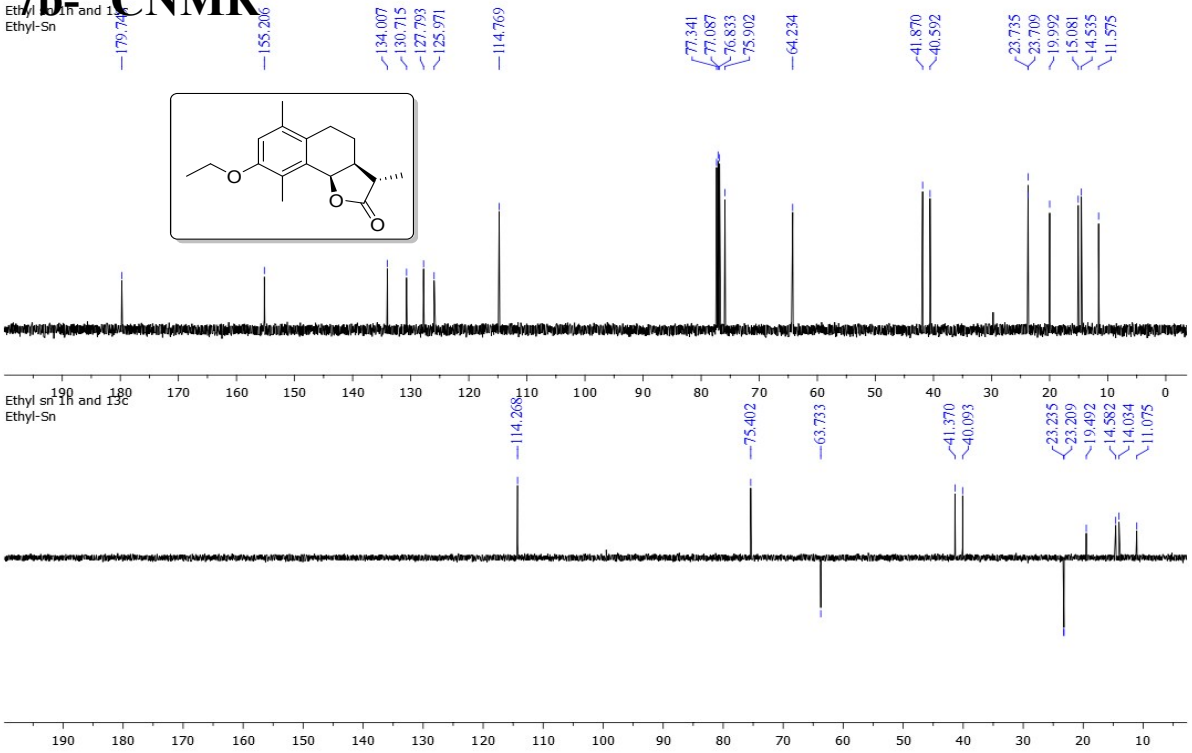

## 7b-HRMS

### Compound Table

| Compound Label     | RT    | Mass     | Formula    | MFG Formula | MFG Diff (ppm) | DB Formula |
|--------------------|-------|----------|------------|-------------|----------------|------------|
| Cpd 56: C17 H22 O3 | 0.341 | 274.1566 | C17 H22 O3 | C17 H22 O3  | 1.01           | C17 H22 O3 |

| Compound Label     | m/z      | RT    | Algorithm                 | Mass     |
|--------------------|----------|-------|---------------------------|----------|
| Cpd 56: C17 H22 O3 | 275.1638 | 0.341 | Find by Molecular Feature | 274.1566 |

### MFE MS Spectrum

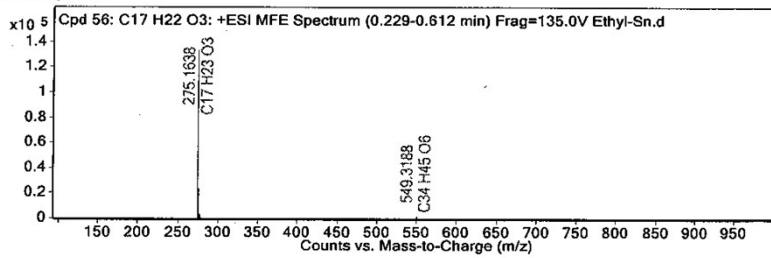

### MS Spectrum Peak List

| m/z      | z | Abund     | Formula    | Ion     |
|----------|---|-----------|------------|---------|
| 275.1638 | 1 | 133000.11 | C17 H23 O3 | (M+H)+  |
| 276.1675 | 1 | 23110.87  | C17 H23 O3 | (M+H)+  |
| 277.1706 | 1 | 3223.87   | C17 H23 O3 | (M+H)+  |
| 278.1738 | 1 | 676.89    | C17 H23 O3 | (M+H)+  |
| 549.3188 | 1 | 1699.39   | C34 H45 O6 | (2M+H)+ |

### Predicted Isotope Match Table

| Isotope | m/z      | Calc m/z | Diff (ppm) | Abund % | Calc Abund % | Abund Sum % | Calc Abund Sum % |
|---------|----------|----------|------------|---------|--------------|-------------|------------------|
| 1       | 275.1638 | 275.1642 | 1.23       | 100     | 100          | 83.12       | 82.47            |
| 2       | 276.1675 | 276.1676 | 0.19       | 17.38   | 18.77        | 14.44       | 15.48            |
| 3       | 277.1706 | 277.1703 | -1.23      | 2.42    | 2.28         | 2.01        | 1.88             |
| 4       | 278.1738 | 278.173  | -3.02      | 0.51    | 0.21         | 0.42        | 0.17             |

--- End Of Report ---

# 7c-<sup>1</sup>H NMR

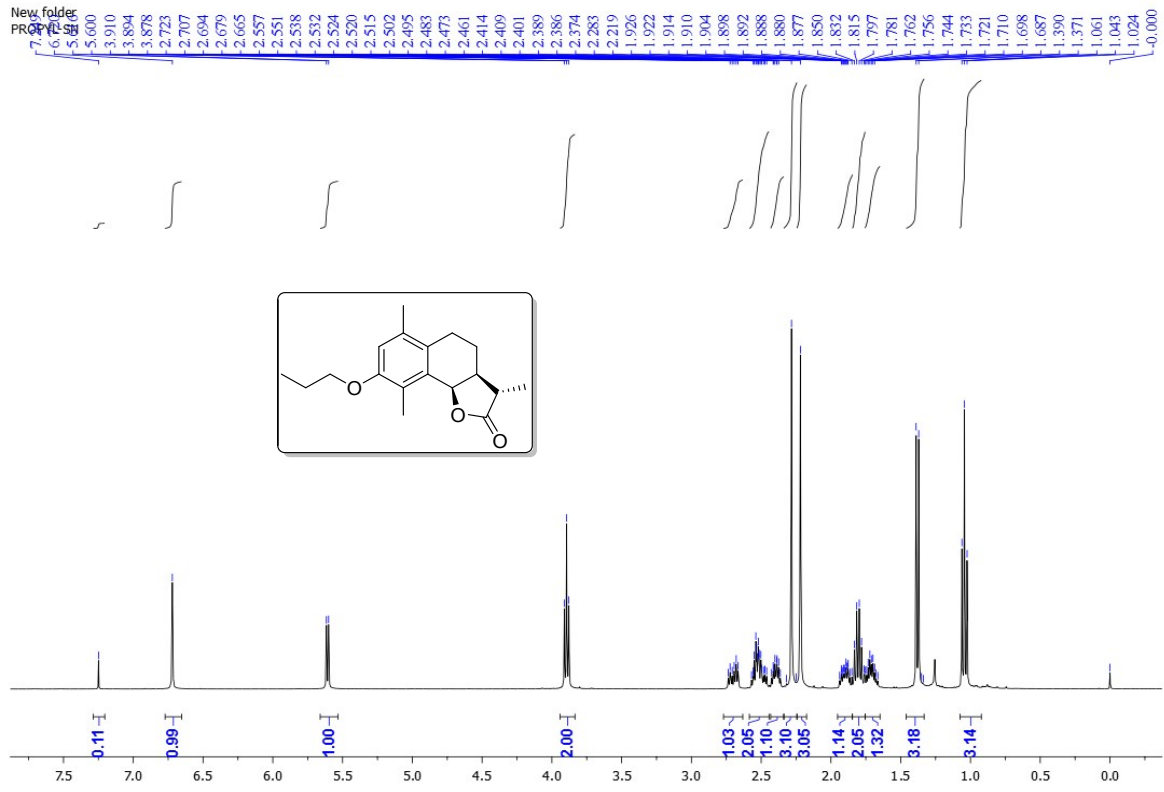

# 7c-<sup>13</sup>C NMR

PROPYL SN 13 C  
Propyl-Sn

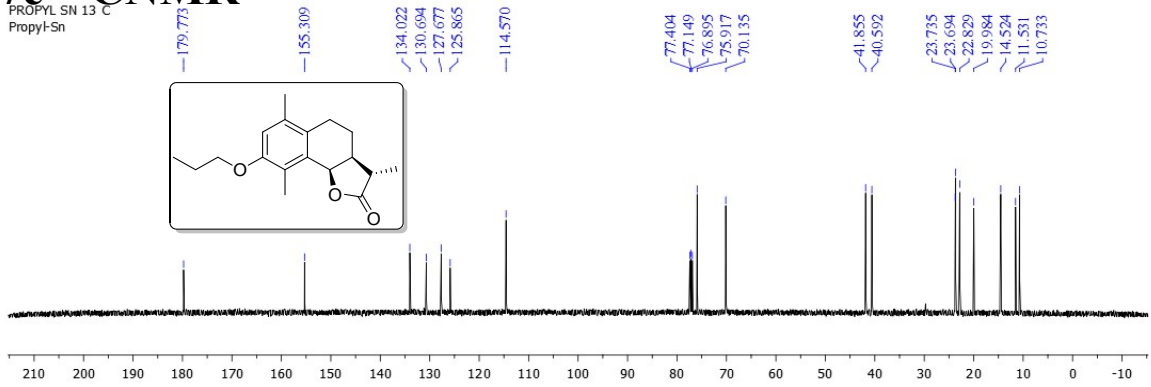

PROPYL SN 13 C  
Propyl-Sn

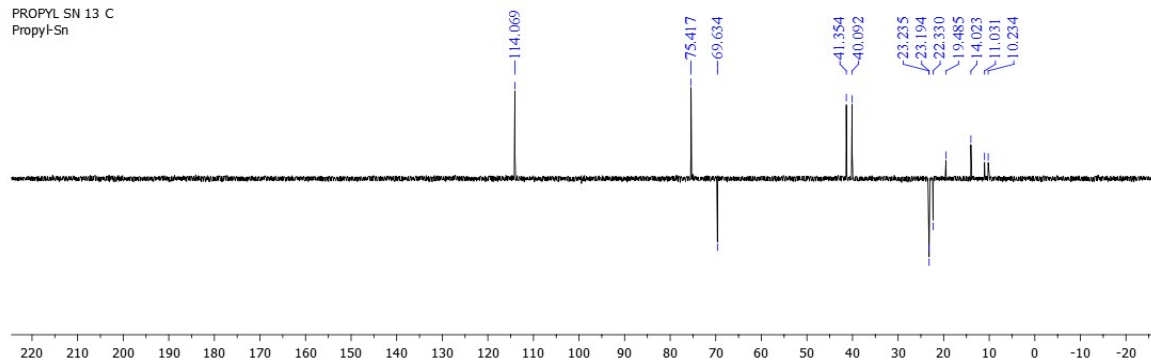

# 7c-HRMS

Compound Table

| Compound Label     | RT    | Mass     | Formula    | MFG Formula | MFG Diff (ppm) | DB Formula |
|--------------------|-------|----------|------------|-------------|----------------|------------|
| Cpd 48: C18 H24 O3 | 0.341 | 288.1739 | C18 H24 O3 | C18 H24 O3  | -4.76          | C18 H24 O3 |

| Compound Label     | m/z      | RT    | Algorithm                 | Mass     |
|--------------------|----------|-------|---------------------------|----------|
| Cpd 48: C18 H24 O3 | 289.1812 | 0.341 | Find by Molecular Feature | 288.1739 |

MFE MS Spectrum

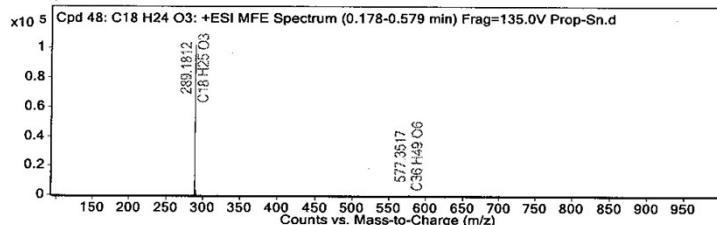

MS Spectrum Peak List

| m/z      | z | Abund     | Formula    | Ion     |
|----------|---|-----------|------------|---------|
| 289.1812 | 1 | 101849.02 | C18 H25 O3 | (M+H)+  |
| 290.1848 | 1 | 22401.21  | C18 H25 O3 | (M+H)+  |
| 291.1877 | 1 | 3268.99   | C18 H25 O3 | (M+H)+  |
| 292.1875 | 1 | 511.43    | C18 H25 O3 | (M+H)+  |
| 577.3517 | 1 | 851.44    | C36 H49 O6 | (2M+H)+ |

Predicted Isotope Match Table

| Isotope | m/z      | Calc m/z | Diff (ppm) | Abund % | Calc Abund % | Abund Sum % | Calc Abund Sum % |
|---------|----------|----------|------------|---------|--------------|-------------|------------------|
| 1       | 289.1812 | 289.1798 | -4.62      | 100     | 100          | 79.55       | 81.57            |
| 2       | 290.1848 | 290.1832 | -5.29      | 21.99   | 19.87        | 17.5        | 16.21            |
| 3       | 291.1877 | 291.186  | -5.9       | 3.21    | 2.49         | 2.55        | 2.03             |
| 4       | 292.1875 | 292.1887 | 4.03       | 0.5     | 0.23         | 0.4         | 0.19             |

--- End Of Report ---

# 7d-<sup>1</sup>H NMR

New folder  
BUTYL-SN

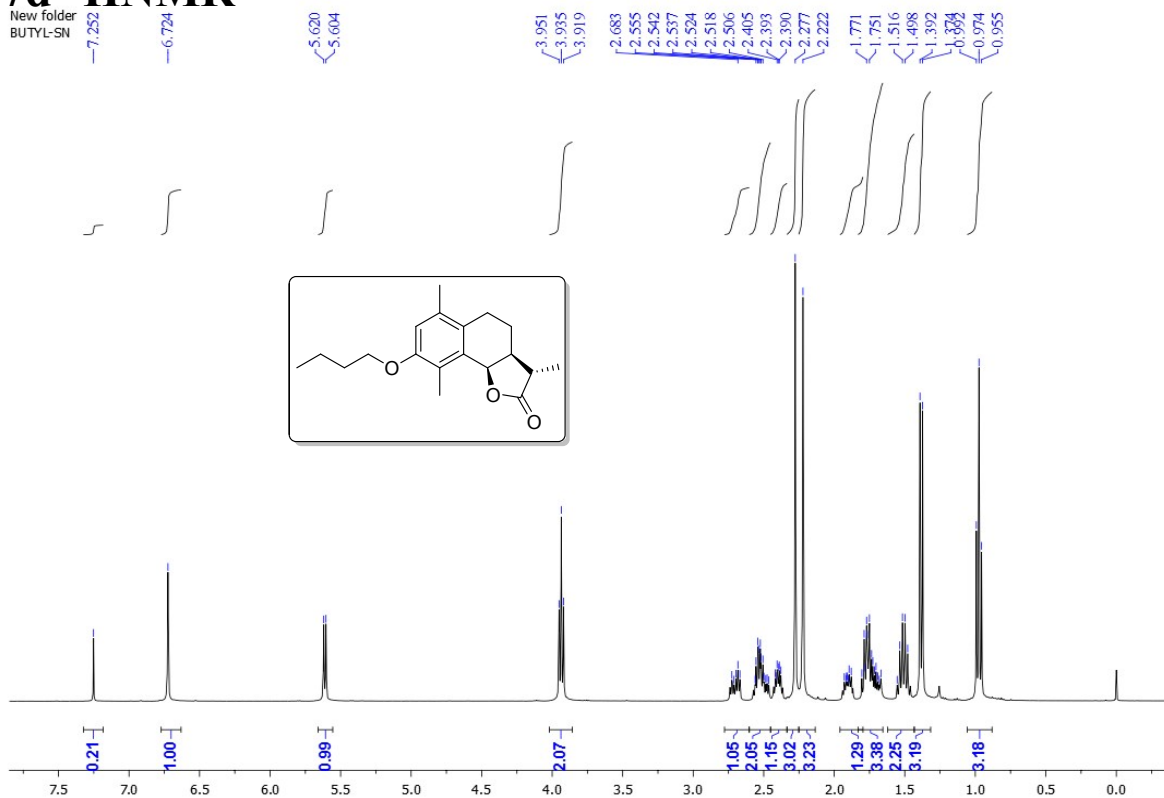

# 7d-<sup>13</sup>C NMR

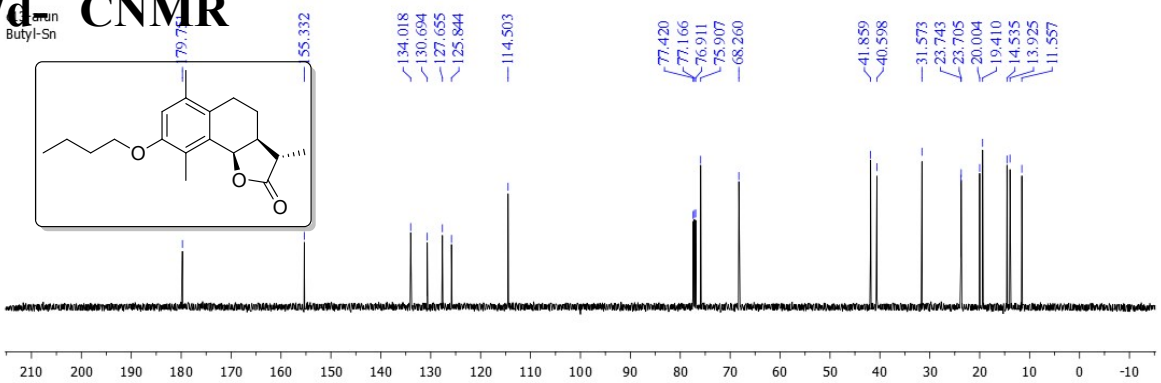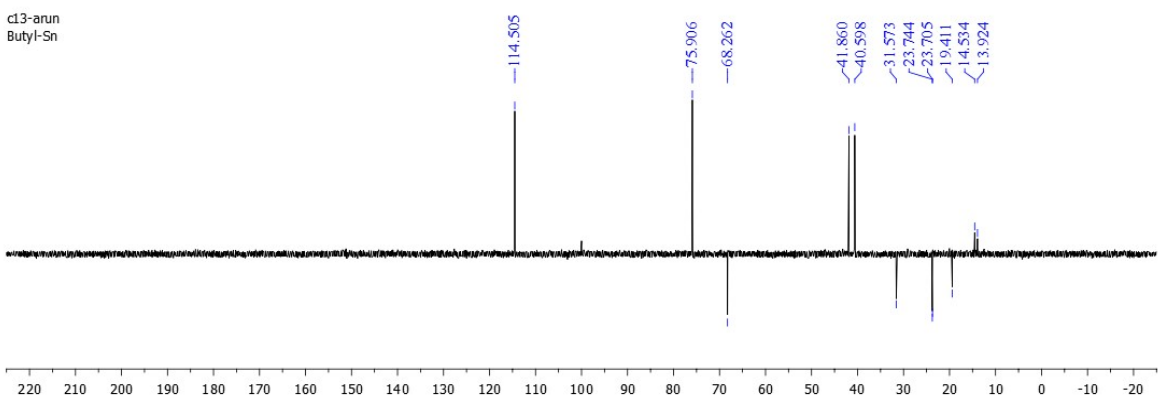

# 7d-HRMS

## Compound Table

| Compound Label     | RT    | Mass     | Formula    | MFG Formula | MFG Diff (ppm) | DB Formula |
|--------------------|-------|----------|------------|-------------|----------------|------------|
| Cpd 37: C19 H26 O3 | 0.339 | 302.1908 | C19 H26 O3 | C19 H26 O3  | -8.68          | C19 H26 O3 |

| Compound Label     | m/z      | RT    | Algorithm                 | Mass     |
|--------------------|----------|-------|---------------------------|----------|
| Cpd 37: C19 H26 O3 | 303.1981 | 0.339 | Find by Molecular Feature | 302.1908 |

## MFE MS Spectrum

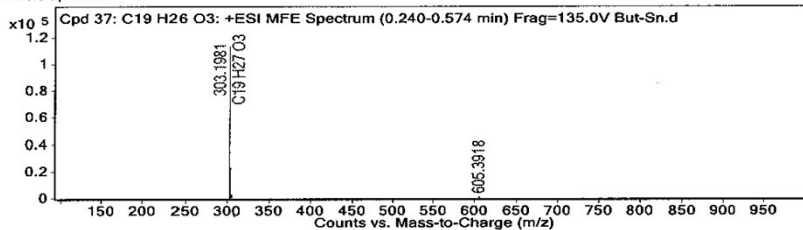

## MS Spectrum Peak List

| m/z      | z | Abund     | Formula    | Ion     |
|----------|---|-----------|------------|---------|
| 303.1981 | 1 | 113229.38 | C19 H27 O3 | (M+H)+  |
| 304.2013 | 1 | 23009.65  | C19 H27 O3 | (M+H)+  |
| 305.2039 | 1 | 3184.22   | C19 H27 O3 | (M+H)+  |
| 605.3918 | 1 | 1108.61   |            | (2M+H)+ |
| 606.3932 | 1 | 406.07    |            | (2M+H)+ |

## Predicted Isotope Match Table

| Isotope | m/z      | Calc m/z | Diff (ppm) | Abund % | Calc Abund % | Abund Sum % | Calc Abund Sum % |
|---------|----------|----------|------------|---------|--------------|-------------|------------------|
| 1       | 303.1981 | 303.1955 | -8.81      | 100     | 100          | 80.99       | 80.68            |
| 2       | 304.2013 | 304.1989 | -7.98      | 20.32   | 20.97        | 16.46       | 16.92            |
| 3       | 305.2039 | 305.2017 | -7.36      | 2.81    | 2.71         | 2.28        | 2.18             |
| 4       | 306.2081 | 306.2044 | -11.92     | 0.34    | 0.26         | 0.28        | 0.21             |

--- End Of Report ---

# 7e-<sup>1</sup>H NMR

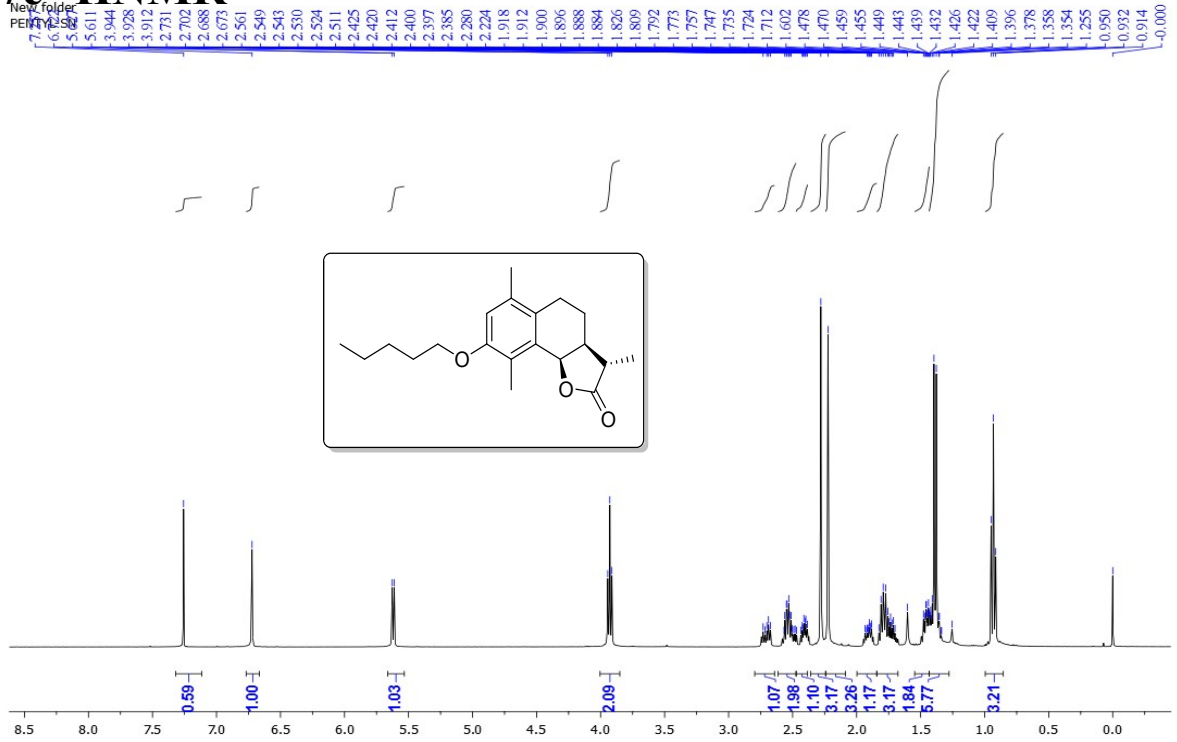

# 7e-<sup>13</sup>C NMR

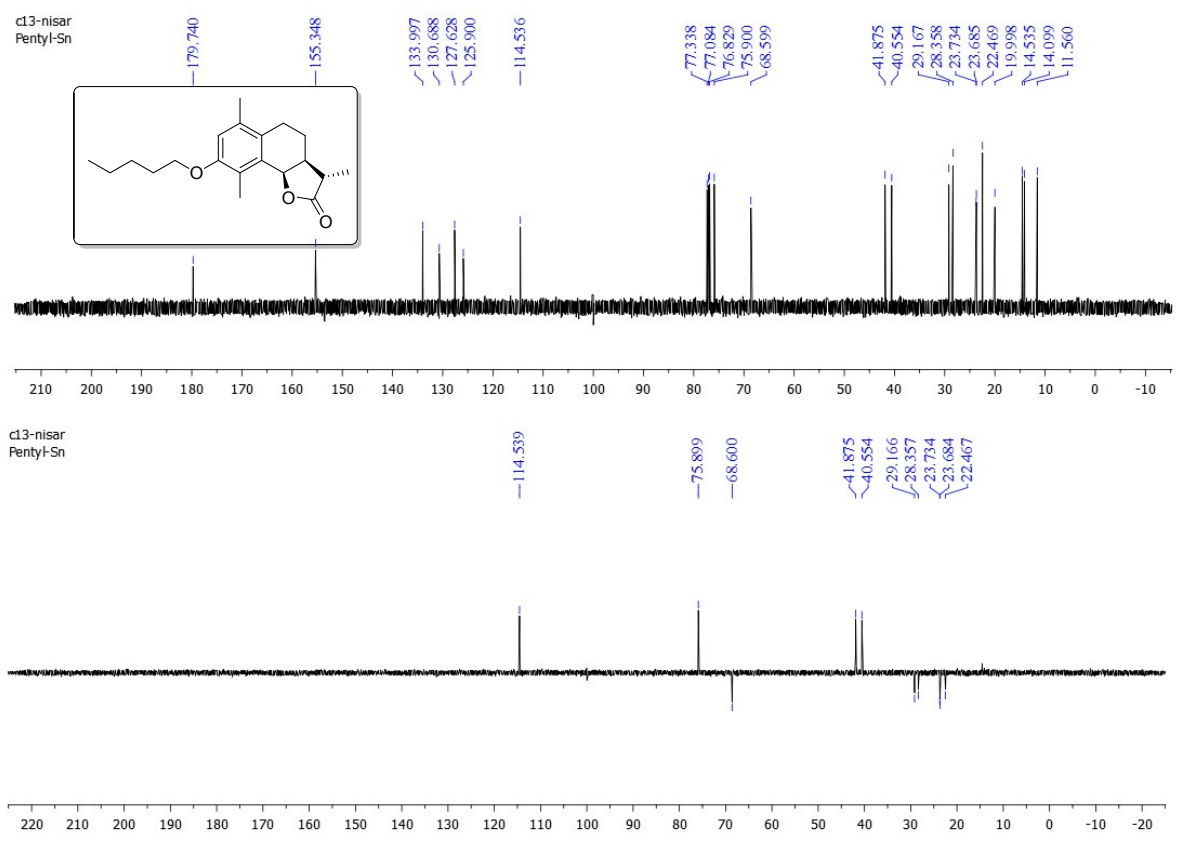

# 7e- HRMS

Compound Table

| Compound Label     | RT    | Mass     | Formula    | MFG Formula | MFG Diff (ppm) | DB Formula |
|--------------------|-------|----------|------------|-------------|----------------|------------|
| Cpd 44: C20 H28 O3 | 0.342 | 316.2015 | C20 H28 O3 | C20 H28 O3  | 7.37           | C20 H28 O3 |

| Compound Label     | m/z      | RT    | Algorithm                 | Mass     |
|--------------------|----------|-------|---------------------------|----------|
| Cpd 44: C20 H28 O3 | 317.2087 | 0.342 | Find by Molecular Feature | 316.2015 |

MFE MS Spectrum

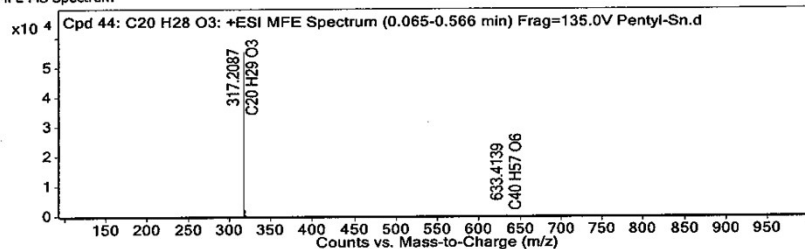

MS Spectrum Peak List

| m/z      | z | Abund    | Formula    | Ion     |
|----------|---|----------|------------|---------|
| 317.2087 | 1 | 55312.84 | C20 H29 O3 | (M+H)+  |
| 318.2124 | 1 | 13000.19 | C20 H29 O3 | (M+H)+  |
| 319.2166 | 1 | 2219.97  | C20 H29 O3 | (M+H)+  |
| 320.2222 | 1 | 278.22   | C20 H29 O3 | (M+H)+  |
| 633.4139 | 1 | 466.63   | C40 H57 O6 | (2M+H)+ |

Predicted Isotope Match Table

| Isotope | m/z      | Calc m/z | Diff (ppm) | Abund % | Calc Abund % | Abund Sum % | Calc Abund Sum % |
|---------|----------|----------|------------|---------|--------------|-------------|------------------|
| 1       | 317.2087 | 317.2111 | 7.73       | 100     | 100          | 78.11       | 79.8             |
| 2       | 318.2124 | 318.2145 | 6.82       | 23.5    | 22.08        | 18.36       | 17.62            |
| 3       | 319.2166 | 319.2174 | 2.56       | 4.01    | 2.94         | 3.14        | 2.34             |
| 4       | 320.2222 | 320.2201 | -6.53      | 0.5     | 0.29         | 0.39        | 0.23             |

--- End Of Report ---

# 7f- <sup>1</sup>H NMR

BNSN

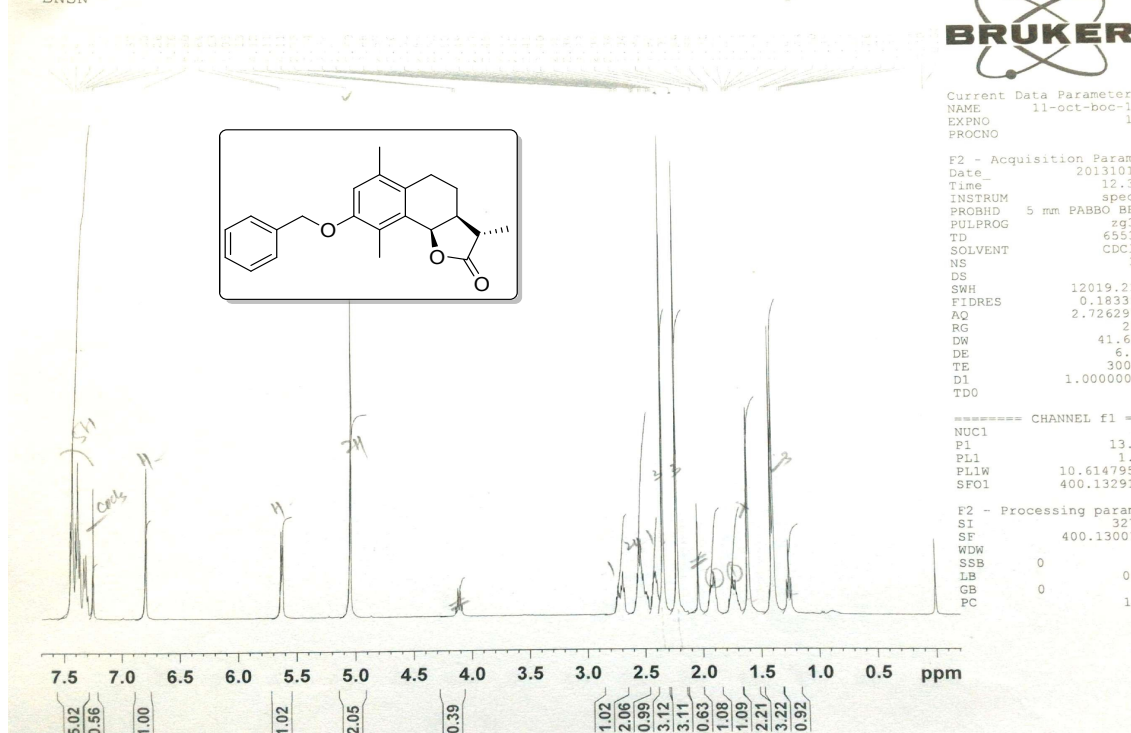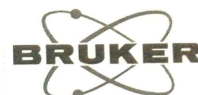

Current Data Parameters  
 NAME 11-oct-boc-1a  
 EXPNO 13  
 PROCNO 1

F2 - Acquisition Parame  
 Date 20131011  
 Time 12.33  
 INSTRUM spect  
 PROBHD 5 mm PABBO BB-  
 PULPROG zg30  
 TD 65536  
 SOLVENT CDCl3  
 NS 32  
 DS 4  
 SWH 12019.231  
 FIDRES 0.183397  
 AQ 2.726297  
 RG 20  
 DW 41.60  
 DE 6.5  
 TE 300.  
 D1 1.0000000  
 TD0

===== CHANNEL f1 ==  
 NUCL1 1  
 P1 13.1  
 PL1 1.0  
 PL1W 10.6147956  
 SFO1 400.132914

F2 - Processing parame  
 SI 3271  
 SF 400.130011  
 WDW 1  
 SSB 0  
 LB 0.  
 GB 0  
 PC 1.



# 7f-<sup>13</sup>CNMR

benzyl and methyl SN 13C  
Benzyl-Sn

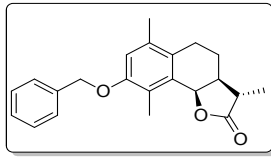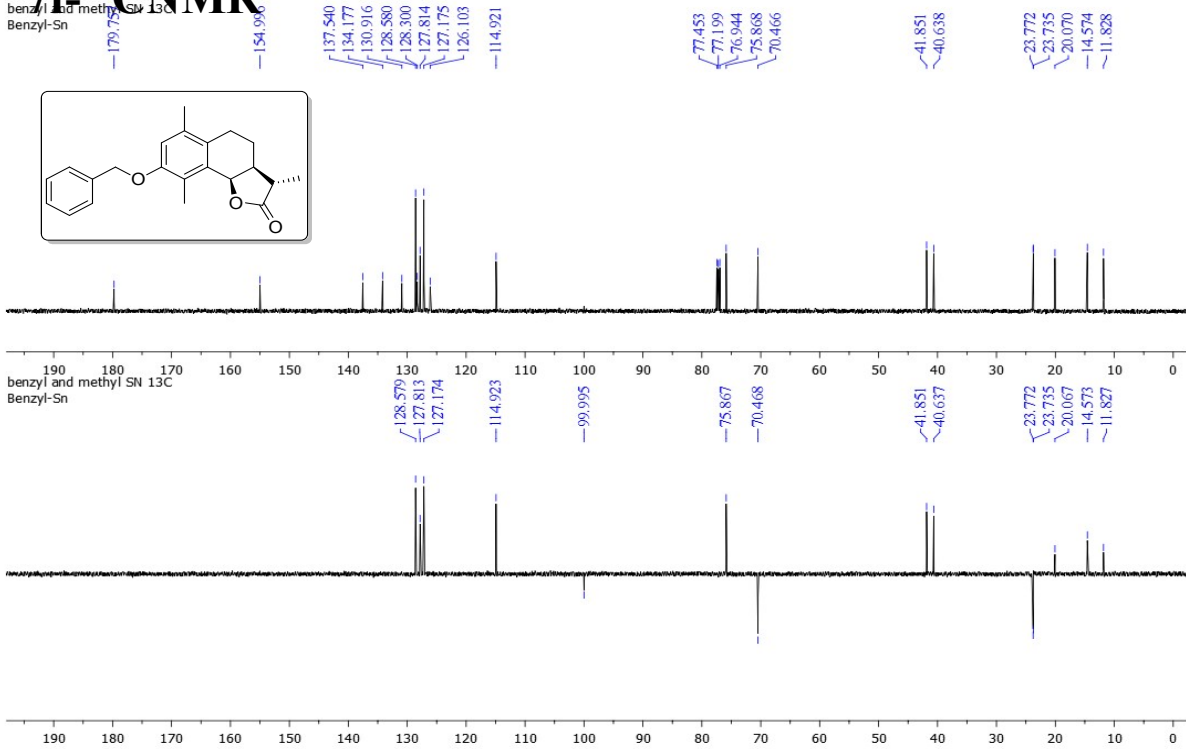

## 7f-HRMS

### Compound Table

| Compound Label     | RT    | Mass     | Formula    | MFG Formula | MFG Diff (ppm) | DB Formula |
|--------------------|-------|----------|------------|-------------|----------------|------------|
| Cpd 37: C22 H24 O3 | 0.342 | 336.1734 | C22 H24 O3 | C22 H24 O3  | -2.48          | C22 H24 O3 |

| Compound Label     | m/z      | RT    | Algorithm                 | Mass     |
|--------------------|----------|-------|---------------------------|----------|
| Cpd 37: C22 H24 O3 | 337.1807 | 0.342 | Find by Molecular Feature | 336.1734 |

### MFE MS Spectrum

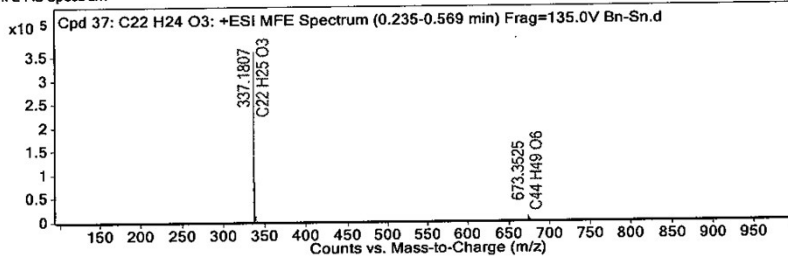

### MS Spectrum Peak List

| m/z      | z | Abund     | Formula    | Ion     |
|----------|---|-----------|------------|---------|
| 337.1807 | 1 | 360433.63 | C22 H25 O3 | (M+H)+  |
| 338.1838 | 1 | 82600.91  | C22 H25 O3 | (M+H)+  |
| 339.1869 | 1 | 12149.19  | C22 H25 O3 | (M+H)+  |
| 673.3525 | 1 | 11205.7   | C44 H49 O6 | (2M+H)+ |
| 674.3558 | 1 | 6455.44   | C44 H49 O6 | (2M+H)+ |

### Predicted Isotope Match Table

| Isotope | m/z      | Calc m/z | Diff (ppm) | Abund % | Calc Abund % | Abund Sum % | Calc Abund Sum % |
|---------|----------|----------|------------|---------|--------------|-------------|------------------|
| 1       | 337.1807 | 337.1798 | -2.63      | 100     | 100          | 78.95       | 78.15            |
| 2       | 338.1838 | 338.1832 | -1.78      | 22.92   | 24.2         | 18.09       | 18.91            |
| 3       | 339.1869 | 339.1862 | -2.28      | 3.37    | 3.42         | 2.66        | 2.67             |
| 4       | 340.1899 | 340.1889 | -2.87      | 0.38    | 0.35         | 0.3         | 0.28             |

--- End Of Report ---

7g-1 <sup>1</sup>H NMR

66

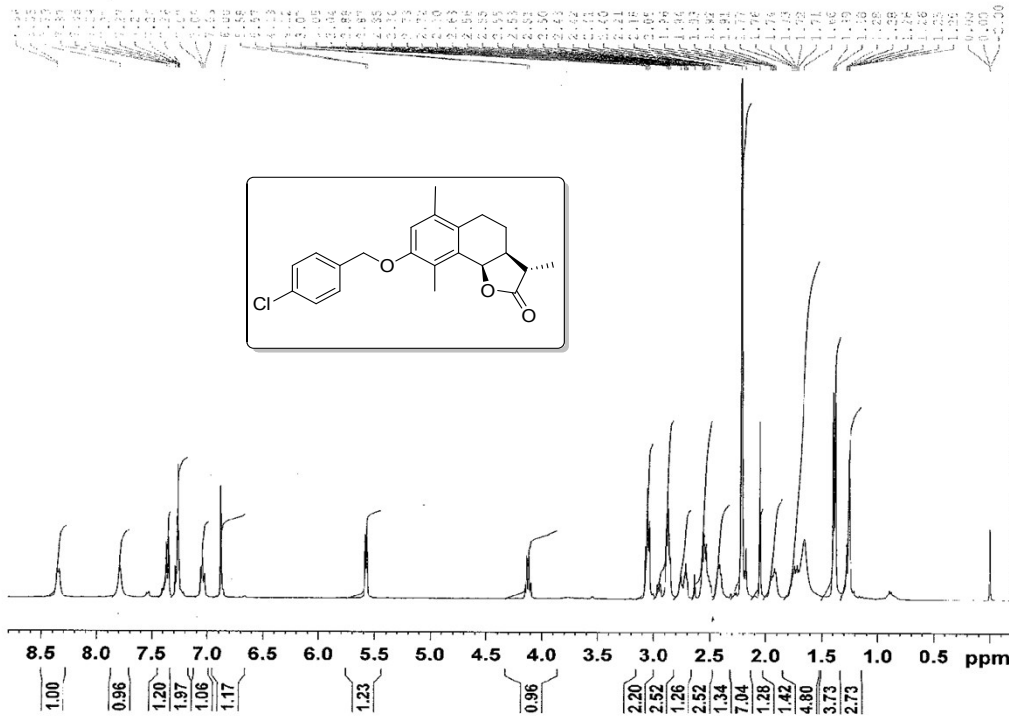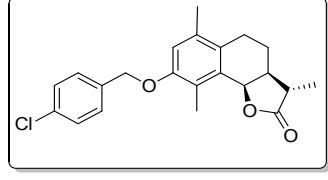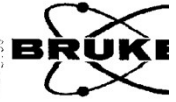

Current Data Para  
 NAME 11-oct-  
 EXNO  
 PROCNO  
 F2 - Acquisition  
 Date 20  
 Time  
 INSTRUM  
 PROBHD 5 mm PAB  
 PULPROG  
 TD  
 SOLVENT  
 NS  
 DS  
 SWH 120  
 FIDRES 0.  
 AQ 2.7  
 RG  
 DW  
 DE  
 TE  
 D1 1.00  
 TD0  
 ===== CHANNEL  
 NUC1  
 P1  
 PL1  
 PLW 10.61  
 SFO1 400.1  
 F2 - Processing p  
 SI  
 SF  
 SDW 400.1  
 SSB 0  
 LB  
 GB 0  
 FC

7g-13 <sup>13</sup>C NMR

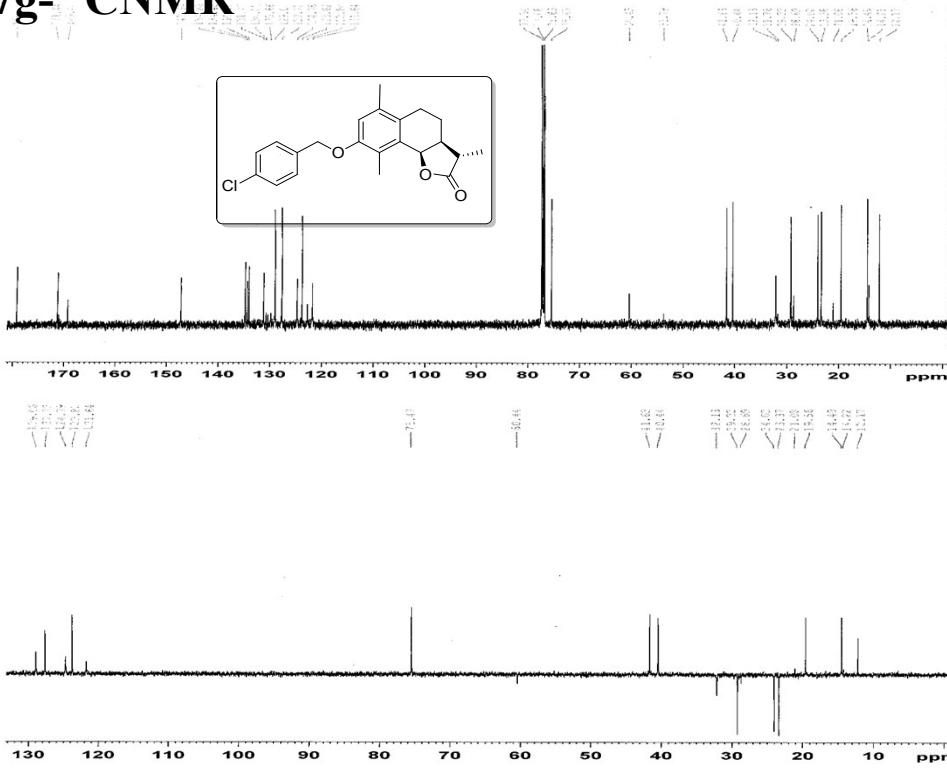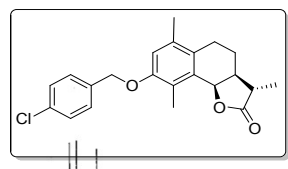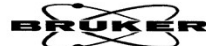

Current Data Parameter:  
 NAME c13-pravee  
 EXNO  
 PROCNO  
 F2 - Acquisition Para  
 Date 2013101  
 Time 12.5  
 INSTRUM spect  
 PROBHD 5 mm BBO  
 PULPROG zgpg30  
 TD 65523  
 SOLVENT CDCl3  
 NS 58  
 DS  
 SWH 31446.54  
 FIDRES 0.447583  
 AQ 1.042022  
 RG 1824.1  
 DW 15.90  
 DE 6.0  
 TE 68.3  
 D1 1.000000  
 TD0 0.030000  
 DELTA 0.000000  
 F1 125.770364  
 NUC1 13  
 P1 8.4  
 PL1  
 PLW 500.132000  
 SFO1 500.132000  
 NUC2  
 CPDPRG2 waltz16  
 F3 1.000000  
 PCPD2  
 PLW2 -1.000000  
 PLW3 -1.000000  
 PLW4  
 F2 - Processing para  
 SI 125.757789  
 SF  
 SDW 125.757789  
 SSB 0  
 LB 1.01  
 GB 0  
 FC 1.44



# 7g-HRMS

Compound Table

| Compound Label        | RT    | Mass    | Formula       | MFG Formula   | MFG Diff (ppm) | DB Formula    |
|-----------------------|-------|---------|---------------|---------------|----------------|---------------|
| Cpd 41: C22 H23 Cl O3 | 0.341 | 370.134 | C22 H23 Cl O3 | C22 H23 Cl O3 | -1.17          | C22 H23 Cl O3 |

| Compound Label        | m/z      | RT    | Algorithm                 | Mass    |
|-----------------------|----------|-------|---------------------------|---------|
| Cpd 41: C22 H23 Cl O3 | 371.1412 | 0.341 | Find by Molecular Feature | 370.134 |

MFE MS Spectrum

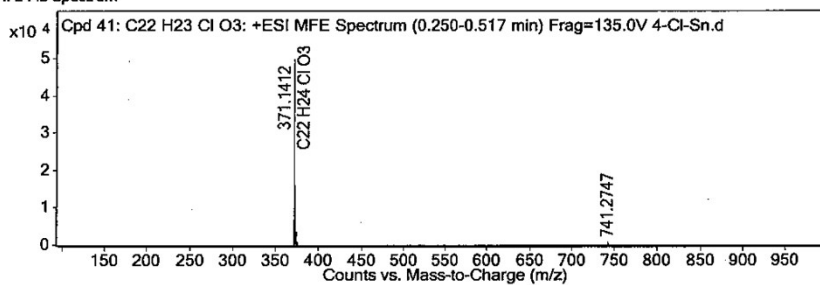

MS Spectrum Peak List

| m/z      | z | Abund    | Formula       | Ion     |
|----------|---|----------|---------------|---------|
| 371.1412 | 1 | 49728.36 | C22 H24 Cl O3 | (M+H)+  |
| 372.1446 | 1 | 14165.91 | C22 H24 Cl O3 | (M+H)+  |
| 373.1395 | 1 | 15888.38 | C22 H24 Cl O3 | (M+H)+  |
| 374.1419 | 1 | 3672.21  | C22 H24 Cl O3 | (M+H)+  |
| 741.2747 | 1 | 902.98   |               | (2M+H)+ |

Predicted Isotope Match Table

| Isotope | m/z      | Calc m/z | Diff (ppm) | Abund % | Calc Abund % | Abund Sum % | Calc Abund Sum % |
|---------|----------|----------|------------|---------|--------------|-------------|------------------|
| 1       | 371.1412 | 371.1408 | -0.96      | 100     | 100          | 59.07       | 59.24            |
| 2       | 372.1446 | 372.1442 | -0.93      | 28.49   | 24.18        | 16.83       | 14.33            |
| 3       | 373.1395 | 373.1388 | -1.89      | 31.95   | 35.41        | 18.87       | 20.98            |
| 4       | 374.1419 | 374.1417 | -0.52      | 7.38    | 8.09         | 4.36        | 4.79             |
| 5       | 375.147  | 375.1444 | -6.87      | 1.47    | 1.12         | 0.87        | 0.66             |

--- End Of Report ---
